# Supplementary material for: Cross-sectional hospital-based study on the seroprevalence of hepatitis B virus markers among healthcare workers, NWR, Cameroon
Source: PubMed Central journal article supplement — BMJ Open. 2021 Jul 1;11(7):e045716. doi: 10.1136/bmjopen-2020-045716 (PMC8252875; doi:10.1136/bmjopen-2020-045716), 2021-07-01
Supplement: bmjopen-2020-045716.draft_revisions.pdf [file bmjopen-2020-045716.draft_revisions.pdf]

# BMJ Open

BMJ Open is committed to open peer review. As part of this commitment we make the peer review history of every article we publish publicly available.

When an article is published we post the peer reviewers' comments and the authors' responses online. We also post the versions of the paper that were used during peer review. These are the versions that the peer review comments apply to.

The versions of the paper that follow are the versions that were submitted during the peer review process. They are not the versions of record or the final published versions. They should not be cited or distributed as the published version of this manuscript.

BMJ Open is an open access journal and the full, final, typeset and author-corrected version of record of the manuscript is available on our site with no access controls, subscription charges or pay-per-view fees (<http://bmjopen.bmj.com>).

If you have any questions on BMJ Open's open peer review process please email [info.bmjopen@bmj.com](mailto:info.bmjopen@bmj.com)

# BMJ Open

## Sero-prevalence of Hepatitis B virus markers among health care workers in the North West Region of Cameroon.

|                               |                                                                                                                                                                                                                                                                                                                                                                                                                                                                                                           |
|-------------------------------|-----------------------------------------------------------------------------------------------------------------------------------------------------------------------------------------------------------------------------------------------------------------------------------------------------------------------------------------------------------------------------------------------------------------------------------------------------------------------------------------------------------|
| Journal:                      | <i>BMJ Open</i>                                                                                                                                                                                                                                                                                                                                                                                                                                                                                           |
| Manuscript ID                 | bmjopen-2020-045716                                                                                                                                                                                                                                                                                                                                                                                                                                                                                       |
| Article Type:                 | Original research                                                                                                                                                                                                                                                                                                                                                                                                                                                                                         |
| Date Submitted by the Author: | 09-Oct-2020                                                                                                                                                                                                                                                                                                                                                                                                                                                                                               |
| Complete List of Authors:     | Akazong, Etheline; University of Dschang, Department of Biochemistry<br>Tume, Christopher; University of Dschang Faculty of Sciences; University of Bamenda, Department of Biochemistry<br>Ayong, Lawrence; Centre Pasteur Cameroun<br>Njouom, Richard; Centre Pasteur of Cameroon,<br>Kenmoe, Sebastien; Centre Pasteur of Cameroon, Virology<br>Njankouo, Ripa; Centre Pasteur du Cameroun, Virology Unit<br>Kuiate, Jules-Roger; University of Dschang Faculty of Sciences, Department of Biochemistry |
| Keywords:                     | Epidemiology < INFECTIOUS DISEASES, VIROLOGY, Public health < INFECTIOUS DISEASES                                                                                                                                                                                                                                                                                                                                                                                                                         |
|                               |                                                                                                                                                                                                                                                                                                                                                                                                                                                                                                           |

SCHOLARONE™  
Manuscripts

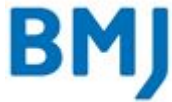

I, the Submitting Author has the right to grant and does grant on behalf of all authors of the Work (as defined in the below author licence), an exclusive licence and/or a non-exclusive licence for contributions from authors who are: i) UK Crown employees; ii) where BMJ has agreed a CC-BY licence shall apply, and/or iii) in accordance with the terms applicable for US Federal Government officers or employees acting as part of their official duties; on a worldwide, perpetual, irrevocable, royalty-free basis to BMJ Publishing Group Ltd ("BMJ") its licensees and where the relevant Journal is co-owned by BMJ to the co-owners of the Journal, to publish the Work in this journal and any other BMJ products and to exploit all rights, as set out in our [licence](#).

The Submitting Author accepts and understands that any supply made under these terms is made by BMJ to the Submitting Author unless you are acting as an employee on behalf of your employer or a postgraduate student of an affiliated institution which is paying any applicable article publishing charge ("APC") for Open Access articles. Where the Submitting Author wishes to make the Work available on an Open Access basis (and intends to pay the relevant APC), the terms of reuse of such Open Access shall be governed by a Creative Commons licence – details of these licences and which [Creative Commons](#) licence will apply to this Work are set out in our licence referred to above.

Other than as permitted in any relevant BMJ Author's Self Archiving Policies, I confirm this Work has not been accepted for publication elsewhere, is not being considered for publication elsewhere and does not duplicate material already published. I confirm all authors consent to publication of this Work and authorise the granting of this licence.

1  
2  
3 **Sero-prevalence of Hepatitis B virus markers among health care workers in the**  
4 **North West Region of Cameroon.**  
5

6 Akazong Etheline<sup>1</sup>, Tume Christopher<sup>1,2</sup>, Ayong Laurence<sup>3</sup>, Njouom Richard<sup>4</sup>, Kenmoe  
7 Sebastien<sup>4</sup>, Njankouo Ripa<sup>4</sup>, Kuate Jules-Roger<sup>1\*</sup>.  
8  
9

10 <sup>1</sup> Department of Biochemistry, University of Dschang  
11

12 <sup>2</sup> Department of Biochemistry, University of Bamenda  
13

14 <sup>3</sup> Malaria unit, Centre Pasteur of Cameroon, Yaoundé, Cameroon  
15

16 <sup>4</sup> Virology unit, Centre Pasteur of Cameroon, Yaoundé, Cameroon  
17

18 Short title: Akazong *et al.*; 2020  
19

20  
21 \*Corresponding Author  
22

23 Kuate Jules-Roger  
24

25 Department of Biochemistry  
26

27 University of Dschang  
28

29 BP 67, Dschang, Cameroon  
30

31 Fax: +237 234 691 506  
32

33 Tel: +237 699 679 135  
34

35 Email: [jules.kuate@univ-dschang.org](mailto:jules.kuate@univ-dschang.org)  
36  
37  
38  
39  
40  
41  
42  
43  
44  
45  
46  
47  
48  
49  
50  
51  
52  
53  
54  
55  
56  
57  
58  
59  
60

## Abstract

**Background:** Hepatitis B is a blood borne viral infection which stands out as a nosocomial infection in health care settings given that it can be contracted via contact with body fluid and infection is almost always asymptomatic. However, there exist a safe and available vaccine which confers about 96% protection from a Hepatitis B virus (HBV) infection.

**Objective:** Determine the prevalence of the different HBV serological profiles among healthcare workers in the North West Region of Cameroon.

**Methods:** A cross-sectional hospital based study was carried out over a 6 months period during which 395 health care workers from all health facilities in the Bamenda Health District, NWR, Cameroon, registered at the regional delegation of health were recruited. Their serum was tested for the presence of HBV core antibody (anti-HBc), Hepatitis B surface antibody (anti-HBs), HBV e antibody (anti-HBe) and Hepatitis B surface antigen (HBsAg) using MONALISA ELISA kits.

**Results:** Among the 395 participants, 68.4% of them were females, 47.3% (187) had been exposed to HBV (reactive for anti-HBc), 36.7% (145) succeeded in resolving the infection (reactive for anti-HBc and anti-HBs), 10.6% (42) were current HBV carriers (HBsAg positive), 2.5% (10) were infective (reactive for anti-HBc and HBsAg but non-reactive for anti-HBe and anti-HBs), 9.1% (36) were vaccinated (reactive for anti-HBs and non-reactive for anti-HBc) and 43.5% (172) were still susceptible to the infection (negative for all HBV serological markers). There was a significant association between exposure, past infection, susceptibility and age.

**Conclusion:** The prevalence of HBV exposure and infection among HCWs obtained in this study was high while the level of vaccination in this at risk population was low. Adequate steps should be taken to sensitize this population on HBV and the vaccination procedure.

**Keys words:** HBV, HCWs, antigen, antibody.

1  
2  
3 **Abbreviations:** HBV: Hepatitis B virus, anti-HBc: hepatitis B core antibody, anti-HBs:  
4 Hepatitis B surface antibody, anti-HBe: HBV e antibody, HBsAg: Hepatitis B surface  
5 antigen, MD: Medical doctor, Lab tech: Laboratory technician, HCWs: Health care workers,  
6 SRN/SRM: State Registered Nurse/Midwife, NWR: North West Region, HND: Higher  
7 National Diploma, BSc: Bachelor of Science, HBsAg: Hepatitis B surface antigen, ELISA:  
8 Enzyme-linked immunosorbent assay, CMA: Centre medical d'arrondissement (district  
9 medical centres).

10  
11  
12  
13  
14  
15  
16  
17 **Strength:**

- 18 ➤ Monalisa™ ULTRA ELISA kits with 100% sensitivity and specificity of 99.28% was  
19 used to determine current HBV infection (HBsAg positivity).
- 20 ➤ Stratified sampling technique, which permits estimation of population parameters  
21 for groups within population was used for sampling.

22  
23  
24  
25  
26  
27  
28 **Limitation:**

- 29 ➤ The anti-HBs titer was not quantified thus the percentage of HCWs considered to  
30 be vaccinated in this study is higher than the actual percentage with a protective  
31 level of anti-HBs.
- 32 ➤ Liver biopsy was not done to prove the complete clearance of the virus in resolved  
33 infection. Resolved infection was assumed when anti-HBs was positive but HBsAg  
34 was negative. Thus the prevalence of resolved infection may have been over-  
35 estimated.
- 36 ➤ The present study covers a cross-section of health professionals, so caution  
37 should be taken while generalizing the results.

## INTRODUCTION

Hepatitis B infection is a viral infection that attacks the liver and can cause both acute, self-resolving, and chronic disease (1). The Hepatitis B virus (HBV), made of a partially double stranded DNA belongs to the family of Hepadnaviridae. This virus found in both blood and body fluids of infected persons, can be transmitted to the mucus membrane or blood stream of non-infected persons (1). Infection with HBV is preventable with the presence of a vaccine which confers over 96% protection to recipients (2). According to the WHO fact sheet updated in July 2018, an estimated 257 million people are infected with HBV worldwide and more than 887,000 people died in 2015 due to complications of HBV including cirrhosis and hepatocellular carcinoma (3). The level of hepatitis B varies widely across WHO regions with the WHO African Region and the WHO Western Pacific Region sharing the greatest burden (6.1% and 6.2% of the population respectively). In Cameroon, a sub-Saharan African country, HBV infection is considered hyper-endemic with a prevalence rate estimated at 11.5% (4). Health-care workers (HCWs) whose job is to care for the sick and injured are often exposed to blood and other body fluids in the course of their work. Consequently, they are at increased risk of infection with blood borne viruses such as HIV, HBV and HCV (5). The risk of infection for health workers depend on the prevalence of the disease in the patient population and the nature and the frequency of exposures (6). HCWs when infected, are at risk of transmitting HBV to their patients (6). Because of the risk associated with their occupation, WHO recommends that all non-infected health care workers be vaccinated against HBV (5).

A national survey in Cameroon on the prevalence of HBV among HCWs reported a national sero-prevalence of 8.75% current infection in this at-risk group (7). The prevalence of HBV among HCWs in the North-West Region was 8%, higher than that obtained in other regions like the West (5.7%) and the East (4.7%) but lower than what was obtained in the South (12%) and the Far North (24%) regions of the country. A recent study carried out among HCWs in this region reported a prevalence of 10.6% (8). This study like most of the other studies carried out in the country focused only on the prevalence of current HBV infection (HBsAg positivity). Very little work has been done on the other HBV serological markers (anti-HBc, anti-HBs, anti-HBe and HBeAg) to evaluate exposure, natural immunity (past or resolved infection), infectivity, vaccination

1  
2  
3 (acquired immunity) and susceptibility. Among these, Tatsilong *et al.*, working with  
4 HCWs in a hospital in Yaoundé reported a prevalence of 11% current infection, 8 %  
5 natural immunity, 19 % vaccinated and 62 % susceptible subjects (9) while Yu-Ling Qin  
6 *et al.*, working with HCWs in Sierra Leone reported 10.0% current infection, 4.3% past  
7 infection, 4.3% acquired immunity, 0.5% infective subjects and 81.5% susceptible  
8 subjects (10)  
9  
10  
11  
12  
13  
14

15 In this study, we therefore set out to evaluate the different serological markers associated  
16 with HBV infection (anti-HBc, anti-HBs, HBsAg and anti-HBe). These serological markers  
17 were used to evaluate the prevalence of exposure, natural immunity, current infection,  
18 infectivity, acquired immunity and susceptibility to HBV among HCWs in our setting  
19 Knowledge on these relevant HBV epidemiological features in this at-risk group can assist  
20 in the development of specific programs such as vaccination campaigns for susceptible  
21 HCWs and guide health policy makers in prioritizing and optimizing treatment of infected  
22 and/or infective HCWs. This in turn can help public health surveillance institutions in our  
23 resource-limited setting to optimizes the available resources.  
24  
25  
26  
27  
28  
29  
30  
31  
32

## 33 **MATERIALS AND METHODS**

### 34 **Study design and setting**

35 This was a cross-sectional hospital-based study conducted between April and September  
36 2017. The study included 22 health facilities in the Bamenda health district (one regional  
37 hospital, three CMAs (Centre medical d'arrondissement), six mission hospitals, five  
38 government health centres and seven private hospitals). Testing stations were set up in  
39 the various wards of the health facilities. Over 70% of HCWs in the various health  
40 facilities were recruited for this study.  
41  
42  
43  
44  
45  
46  
47  
48

### 49 **Case definition**

50 In this study, exposure was defined as being tested positive for the antibody anti-HBc  
51 only, natural immunity (past/resolved infection) was being tested positive for anti-HBc  
52 and anti-HBs, current infection was defined as was being tested positive for the antigen  
53 HBsAg, infective subjects were those who were tested positive for HBsAg and negative  
54 for anti-Hbe, vaccinated subjects were those who were positive for anti-HBs only while  
55  
56  
57  
58  
59  
60



1  
2  
3 susceptible (naïve) subjects were those who were negative for all HBV serological  
4 markers. Being tested positive implies they were reactive for the marker of interested.  
5  
6  
7

### 8 **Sample size and justification**

9  
10 Sample size was determined using the formula proposed by Scott Smith for determining  
11 population proportion sample size (11):  $X=Z\text{-score} \times SD \times (1-SD)/MOE$ . The proportion  
12 of HCWs in NWR was obtained from a registry which published the national proportions  
13 of HCWs per region in 2015 (12). The confidence level was 95%, giving a Z-score of 1.96,  
14 a margin of error (MOE) of  $\pm 5$  and an SD of 0.5. The calculated sample size using this  
15 formula was 385 persons.  
16  
17  
18  
19  
20  
21

### 22 **Sample collection**

23  
24 All HCWs present in the Bamenda Health District during the study were invited to  
25 participate in this study. HCWs who consented to the study were asked to sign a consent  
26 form, fill a self-administered questionnaire after which 4ml of blood was collected from  
27 them into a red cap (dry) tube. Identification number was used to link participant's  
28 laboratory results and the questionnaire. A standardized questionnaire designed by the  
29 researcher was used to collect socio-demographic data and HCWs category. HCWs  
30 included medical doctors, nurses, laboratory technicians, dentist, pharmacist and  
31 hospital auxiliary staff (cleaners, carriers, launders).  
32  
33  
34  
35  
36  
37  
38  
39

### 40 **HBV serology**

41  
42 Different MONOLISA ELISA kits obtained from Bio-Rad (Marnes-La-Coquette-France)  
43 were used to test for the presence of total anti-HBc, anti-HBs, HBsAg and anti-HBe. All  
44 ELISA assays were performed according to manufacturer's instructions.  
45  
46  
47  
48

### 49 **Statistical analysis**

50  
51 Statistical analysis was performed using the Statistical software IBM® SPSS® Statistics  
52 Version 22.0 for mac. Continuous data were expressed as median values with 1st and 3rd  
53 interquartile ranges (IQR). Categorical data were expressed as percentages. Pearson's  $\chi^2$   
54 ( $p < .05$ ) was used to assess the significance among study variables. Odd ratio (OR) was  
55 used to evaluate the strength of association between study variables.  
56  
57  
58  
59  
60

## RESULTS

### Characteristics of study population

A total of 395 health care workers from the different hospitals in this region participated in the study. Among these, 68.4% (270) were women (Table 1). The 16 to 25 years old age group was the largest, representing 42.0% of the study population. The median age of the study population was 27.0 years (IQR, 23 - 32 years). Among the HCWs category, nurses were the most represented 224 (56.3%).

### Exposure to HBV

Anti-HBc was used to determine exposure to HBV (Table 2). Of the 395 health care workers who participated in this study, 187 (47.3%) were tested positive for anti-HBc. A statistically significant association was observed between exposure and age ( $p$ -value $<.001$ ) and exposure to HBV increased with age. There was no significant association between sex, HCWs category and exposure. However, exposure was relatively lower among dentist (26.7%) than among other HCWs. Prevalence of exposure was similar between sexes.

### Natural immunity against HBV (HBV clearance)

A combination of anti-HBc and anti-HBs was used to evaluate natural immunity against HBV (past/resolved infection) (Table 2). One hundred and forty-five (77.5%) HCWs who had come in contact with HBV had effectively cleared the virus. Natural immunity was significantly associated with age ( $p$ -value $<.01$ ), and the (35-45) year age group scored the highest prevalence ( $n=28$ , 54.9%) of HBV clearance. There was no significant correlation between ability to clear the hepatitis B virus, sex and HCWs category.

### Current infection to HBV

HBsAg was detected in 42 of the 395 HCWs (10.6%) (Table 2). There was no statistically significant association between sex, age, HCWs category and current infection. HBsAg infection was higher among females ( $n=33$ , 12.2%) than among males ( $n=9$ , 7.2%). Majority of HBsAg infected HCWs belonged to the (45-65) year age group ( $n=4$ , 16.7%) and were dentist ( $n=2$ , 13.3%).

### HBV infectivity among HCWs

1  
2  
3 The presence of HBsAg and the absence of anti-HBe were used to evaluate HBV infectivity  
4 (Table 2). Among the 10.4% of HCWs infected with HBV, (n=10, 23.8%) of them were  
5 infective. There was no significant association between sex, age, job and being HBV  
6 infective. More females were infective (n=8, 3.0%) compared to males (n=2, 1.6%). The  
7 (46-65) year age group recorded the highest prevalence of infective HCWs (n=2, 8.3%),  
8 just like pharmacist (12.5%).  
9

### 15 **Acquired immunity (vaccinated) HCWs**

16  
17 The absence of anti-HBc and the presence of anti-HBs were used to determine vaccinated  
18 HCWs (Table 2). Among the 208 HCWs who had never been exposed to HBV, (n=36,  
19 17.3%) of them were vaccinated. There was no statistically significant association  
20 between being vaccinated, HCWs category, age and sex. Males and females had a similar  
21 prevalence of acquired immunity (12 [9.6%] males and 24 [8.9] females). Most of those  
22 vaccinated belonged to the (26-35) year age group (n=15, 9.7%) and were dentist (n=4,  
23 26.7%).  
24  
25  
26  
27  
28  
29  
30

### 31 **Susceptible HCWs**

32  
33 Susceptibility was determined by the absence of both anti-HBc, anti-HBs and HBsAg in  
34 serum (Table 2). Among the 395 HCWs who participated in this study, (n=172, 43.5%) of  
35 them were still susceptible to HBV. There was a significant association between age and  
36 susceptibility (p-value<.01). Susceptibility significantly decreased with age and was  
37 highest in the (16-25) year age group (n=90, 54.2%). There was no significant association  
38 between susceptibility, sex and HCWs category.  
39  
40  
41  
42  
43  
44

## 45 **DISCUSSION**

46  
47 Hepatitis B virus is a major cause of Chronic Hepatitis, Liver Cirrhosis and Hepatocellular  
48 Carcinoma. As a viral infection, which can be transmitted via percutaneous and mucosal  
49 exposure to infective body fluids, HBV stands as a serious nosocomial infection in health  
50 care settings. The current study, which aimed at evaluating the sero-prevalence of the  
51 different HBV serological profiles among HCWs in the NWR of Cameroon showed a high  
52 HBV burden in this population. Serological testing revealed that HBV exposure was  
53 47.3%, past infection was 36.7%, current infection was 10.6%, infectivity was 2.5%,  
54 acquired immunity was 9.1% and susceptibility was 43.5%. A number of epidemiological  
55  
56  
57  
58  
59  
60

1  
2  
3 and cross-sectional studies have reported marked variation in the prevalence of the  
4 various HBV serological profiles among HCWs within and out of the country (7–10,13–  
5 15). HBV prevalence in this at-risk group seems to vary with the HBV prevalence in the  
6 general population.  
7  
8  
9

10  
11  
12 The high prevalence of HBV exposure (47.3%) obtained in the current study is  
13 comparable to the 44.5% obtained among HCWs in Tanzania in 2015 (13) but relatively  
14 higher than the 19% obtained in Yaoundé in 2016 (9) and the 14% obtained in Sierra  
15 Leone in 2018 (10). The relatively higher prevalence of HBV exposure obtained in this  
16 study compared to that obtained by Tasilong *et al* in Yaoundé could be a result of the  
17 diagnostic technique used, given that Tasilong *et al* worked with the one-step, rapid strip  
18 test which has a lower sensitivity and specificity when compared to the ELISA technique  
19 used in this study (16–19).  
20  
21  
22  
23  
24  
25  
26  
27

28 The prevalence of HBV infection obtained in this study was 10.6%. This prevalence is  
29 higher than the 8.75% obtained by Ndongo *et al.* in their national survey in Cameroon  
30 (7). The lower prevalence could be justified by the fact that the national survey focused  
31 on the regional hospital (which represents the government reference hospital in this  
32 region) and the difference in technique used (rapid strip test). Still, a similar study carried  
33 out in Yaoundé in 2016 among HCWs in a hospital located there found a comparable  
34 prevalence among HCWs [11%) (8) while Loriette *et al.*, working in the Extreme Nord  
35 Region of Cameroon recorded a prevalence of 18% (12). This alternating prevalence,  
36 could actually be a reflection of the cultural and climatic differences existing between the  
37 different ethnic groups alongside the diverse geographical scenery of the country (7).  
38  
39  
40  
41  
42  
43  
44  
45  
46

47 Prevalence of exposure and natural immunity were significantly associated with age. In  
48 effect, it is known that the clinical course and outcome of HBV infection is greatly  
49 influenced by age at infection, the level of HBV replication and the host immune status  
50 (20). But according to Ott J. *et al.*, the decrease in exposure with age could be explained  
51 by the expanded immunization between 1990 to 2005 which led to a decrease in HBV  
52 infections in most regions particularly Central sub-Saharan Africa (21). Furthermore, risk  
53 of transmission might have changed over time due to increased awareness and  
54 precautions like wearing of gloves, frequent hand washing and use of safety needles.  
55  
56  
57  
58  
59  
60

1  
2  
3  
4  
5 The prevalence of infectivity was 2.5% for all the HCWs and 23% for HBV infected HCWs.  
6 The persistence of HBeAg in blood is always associated with progress towards a liver  
7 disease as well as an increase probability of transmitting the virus. Even though there  
8 exist a management guide proposed by WHO in 2015, this high prevalence of infectivity  
9 among infected HCWs could be because of the elevated cost involve in managing the  
10 disease (2).  
11  
12  
13  
14  
15  
16

17 According to CDC updates HBV vaccination guidelines for HCWs (2014), healthcare  
18 personnel should be vaccinated against hepatitis B virus (HBV) before exposure to blood  
19 or body fluids and should receive serologic testing to assess for antibody against the virus  
20 (22). Still, just 9.1% of HCWs in our setting showed acquired immunity. According to  
21 Ndongo et al., auxillary staff were the least likely to be vaccinated compared to the other  
22 HCWs accounting for the low prevalence of acquired immunity (4.9%) among them (7).  
23 HCWs belonging to the (16-25) year age group were the most vaccinated. This might be  
24 because of the expanded immunization between 1990 to 2005 in most regions in Central  
25 sub-saharan Africa invoked earlier (21). Also, some institution now ask for proof of HBV  
26 vaccination in none-infected individuals before hire or matriculation. Overall the low  
27 prevalence of HCWs vaccinated against HBV might either be due to inappropriate  
28 sensitization on HBV or the cost of the HBV vaccine.  
29  
30  
31  
32  
33  
34  
35  
36  
37  
38  
39

40 HBV susceptibility in our study was high (43.5%) and was inversely proportional to age.  
41 The statistically significant association between age and susceptibility to HBV might be  
42 explained by the decrease in childhood and maternal transmission of HBV due to the  
43 expanded immunization between 1990 to 2005 explained above (21). More so, duration  
44 in the hospital increases with age. Thus, the younger HCWs whose duration in healthcare  
45 settings is less than that of older HCWs and who still have a longer period to work in this  
46 settings have not been exposed to HBV nosocomial risk factors like older HCWs and have  
47 a higher risk of eventually getting exposed when compared to older HCWs.  
48  
49  
50  
51  
52  
53  
54  
55

## 56 **CONCLUSION**

57 This study revealed a considerable burden (10.6% current infection) of HBV infection in  
58 the Bamenda health District, North West Region of Cameroon. Among the infected HCWs,  
59  
60

1  
2  
3 23.8% of them were infective. These infective HCWs are at risk of infecting their patients.  
4  
5 Subsidizing management of HBV for HCWs might reduce the prevalence of infective  
6  
7 HCWs and consequently the probability of HBV nosocomial infection from HCWs to their  
8  
9 patients. Prevalence of HBV vaccination was low (9.1%) while prevalence of exposure  
10  
11 (47.3%) and susceptibility (43.5%) to HBV was high in our setting. There is thus a high  
12  
13 need for sensitization of HCWs in this area on HBV transmission and prevention. This  
14  
15 sensitisation along with an effective and massive vaccination campaign should be carried  
16  
17 out in this region not only among HCWs but in the population in general.  
18  
19

## 20 21 **DECLARATIONS**

22  
23  
24 **Statement of Ethics:** Ethical clearance for the study was obtained from the National  
25  
26 Ethics Committee of Cameroon (N°2017/02/871/CE/CNERSH/SP). Authorization to  
27  
28 carry out research in the NWR was obtained from the regional delegation. Authorizations  
29  
30 to access different hospitals were obtained from the directors or the in-charge of the  
31  
32 hospitals. Authorization to access health centers was obtained from the District medical  
33  
34 officer (DMO) and the chief of centers of the health facilities in this region. Written  
35  
36 informed consent was obtained from each participant.  
37

38  
39 **Consent for publication:** Not applicable.  
40

41  
42 **Availability of data and material:** Data are available in a public, open access repository  
43  
44 (<https://doi.org/10.6084/m9.gshare.9641771>).  
45

46  
47 **Competing interests:** The authors declare that they have no competing interests.  
48

49  
50  
51 **Funding:** Not applicable.  
52

53  
54 **Authors' contribution:** AE and TC designed the study; AE and NRipa performed the  
55  
56 experiments; AE drafted the manuscript; TC, NR, AL, KJR and KS were involved in editing  
57  
58 the manuscript; AE and KS performed the statistical analysis. All authors read and  
59  
60 approved the final manuscript.

**Acknowledgement:** All HCWs in the Bamenda Health District who consented to participate in this study; Dr. Akassong D. Dinga Wonanke for helping with the purchase of material, Mr Fondoh Victor for his help at the start of this work, RHB for permitting the blood sample to be stored in the RHB laboratory freezer during sample collection.

## Reference

1. Kathleen D. Hepatitis B: causes, symptoms and treatment. Medical News Today. 2018.
2. World Health Organization. Myths and facts about immunization,. WHO Regional Office for Europe; 2015.
3. WHO. Updated fact sheet: Hepatitis B. In Geneva; 2018.
4. Njouom R, Tejiokem M, Texier G, Fontanet A. O-02: Prevalence of hepatitis B, hepatitis C and hepatitis D virus infections in Cameroon: results from a national population based survey (The ANRS 12289 project). J Viral Hepat. 2015;22(S2):1–2.
5. WHO. Health Care Worker Safety. In Geneva: WHO; 2003.
6. Jessica D, Kyle B, Costi D. Hepatitis B in health care workers: transmission events and guidance management. World J Hepat. 2015;7(3):488–97.
7. Ndongo CB, Eteki L, Siedner M, Mbaye R, Chen J, Ntone R, et al. Prevalence and vaccination coverage of Hepatitis B among healthcare workers in Cameroon: A national seroprevalence survey. Journal of Viral Hepatitis. 2018 Dec 1;25(12):1582–7.
8. Akazong W E, Tume C, Njouom R, Ayong L, Fondoh V, Kuate J-R. Knowledge, attitude and prevalence of hepatitis B virus among healthcare workers: a cross-sectional, hospital-based study in Bamenda Health District, NWR, Cameroon. BMJ Open. 2020 Mar;10(3):e031075.
9. Tatsilong HOP, Noubiap JJN, Nansseu JRN, Aminde LN, Bigna JJR, Ndze VN, et al. Hepatitis B infection awareness, vaccine perceptions and uptake, and serological profile of a group of health care workers in Yaoundé, Cameroon. BMC Public Health [Internet]. 2016 Dec [cited 2018 Dec 11];16(1). Available from: <http://bmcpublichealth.biomedcentral.com/articles/10.1186/s12889-016-3388-z>
10. Chinese Military Medical Experts Group in Sierra Leone, Qin Y-L, Li B, Zhou Y-S, Zhang X, Li L, et al. Prevalence and associated knowledge of hepatitis B infection among healthcare workers in Freetown, Sierra Leone. BMC Infectious Diseases [Internet]. 2018 Dec [cited 2019 Aug 17];18(1). Available from: <https://bmcinfectdis.biomedcentral.com/articles/10.1186/s12879-018-3235-1>
11. Smith SM. Determining-Sample-Size. qualtrics. 2013;7.

12. Tandji TE, Cho Y, Akam AJ-C, Afoh CO, Ryu SH, Choi MS, et al. Cameroon public health sector: shortage and inequalities in geographic distribution of health personnel. *International Journal for Equity in Health* [Internet]. 2015 Dec [cited 2019 Feb 26];14(1). Available from: <http://www.equityhealthj.com/content/14/1/43>
13. Mueller A, Stoetter L, Kalluvya S, Stich A, Majinge C, Weissbrich B, et al. Prevalence of hepatitis B virus infection among health care workers in a tertiary hospital in Tanzania. *BMC Infectious Diseases* [Internet]. 2015 [cited 2018 Dec 11];15(1). Available from: <http://bmcinfectdis.biomedcentral.com/articles/10.1186/s12879-015-1129-z>
14. Fritzsche C, Becker F, Hemmer CJ, Riebold D, Klammt S, Hufert F, et al. Hepatitis B and C: neglected diseases among health care workers in Cameroon. *Transactions of The Royal Society of Tropical Medicine and Hygiene*. 2013 Mar;107(3):158–64.
15. Loriette M, Birguel J, Damza R, Ratoua M, Karsikam S, Sobnangou JJ, et al. An experience of hepatitis B control in a rural area in Far North Cameroon. *Médecine et Santé Tropicales*. 2015;(4):422–427.
16. Erhabor O, Kwaifa I, Bayawa A, Isaac Z, Dorcas I, Sani I. Comparison of ELISA and Rapid Screening Techniques for the Detection of HBsAg among Blood Donors in Usmanu Danfodiyo University Teaching Hospital Sokoto, North Western Nigeria [Internet]. *Journal of Blood & Lymph*. 2014 [cited 2018 Dec 11]. Available from: <https://www.omicsonline.org/open-access/comparison-of-elisa-and-rapid-screening-techniques-for-the-detection-of-hbsag-among-blood-donors-in-usmanu-danfodiyo-university-teaching-hospital-sokoto-north-western-nigeria-2165-7831.1000124.php?aid=30523>
17. Hayder I, Ahmed W, Alam SE. Comparison of Different ICT Kits for HBsAg and Anti HCV Using Gold Standard ELISA. *Pak J Med Res*. 2012;51(3):72–6.
18. Cruz HM, Scalioni L de P, Paula VS de, Miguel JC, Ó KMR do, Milagres FAP, et al. Poor sensitivity of rapid tests for the detection of antibodies to the hepatitis B virus: implications for field studies. *Memórias do Instituto Oswaldo Cruz*. 2017 Jan 30;112(3):209–13.
19. Cruz H, Scalioni L, Vanessa S, Elisangela F, Kycia M, Milagres F, et al. Evaluating HBsAg rapid test performance for different biological samples from low and high infection rate settings & populations. *BMC Infectious Diseases*. 2015;15:548–58.
20. Fattovich G, Zagni I, Scattolini C. Natural History of Hepatitis B and Prognostic Factors of Disease Progression. In: Management of patients with viral hepatitis. In: Marcellin P, editor. Paris: Hepatitis B; 2004. p. 203–20.
21. Ott JJ, Stevens GA, Groeger J, Wiersma ST. Global epidemiology of hepatitis B virus infection: New estimates of age-specific HBsAg seroprevalence and endemicity. *Vaccine*. 2012 Mar;30(12):2212–9.
22. CDC. CDC updates HBV vaccination guidelines for HCWs - The Clinical Advisor [Internet]. *Clinical Advisor*. 2014 [cited 2018 Dec 11]. Available from:



<https://www.clinicaladvisor.com/web-exclusives/cdc-updates-hbv-vaccination-guidelines-for-hcws/article/327757/#>

Table 1: Baseline characteristics of the study population

| <b>Variables</b>     | <b>Frequency<br/>(395)</b> | <b>Percentage<br/>(100%)</b> |
|----------------------|----------------------------|------------------------------|
| <b>Sex</b>           |                            |                              |
| Male                 | 125                        | 31.6                         |
| Female               | 270                        | 68.4                         |
| <b>Age Intervals</b> |                            |                              |
| 16-25                | 166                        | 42.0                         |
| 26-35                | 154                        | 39.0                         |
| 36-45                | 51                         | 12.9                         |
| 46-65                | 24                         | 6.1                          |
| <b>Job</b>           |                            |                              |
| Nurses               | 224                        | 56.7                         |
| Lab Technicians      | 90                         | 22.8                         |
| Medical Doctors      | 17                         | 4.3                          |
| Dentist              | 15                         | 3.8                          |
| Pharmacist           | 8                          | 2.0                          |
| Auxiliary Staff      | 41                         | 10.4                         |

Data are n(%)

Table 2: Distribution of HBV profile group (n=395)

| <b>Variables n(%)</b> | <b>Exposure<br/>187(47.3)</b> | <b>Past<br/>Infection<br/>145(36.7)</b> | <b>Current<br/>Infection<br/>42(10.6)</b> | <b>Infectivity<br/>10(2.5)</b> | <b>Vaccination<br/>36(9.1)</b> | <b>Susceptibility<br/>172(43.5)</b> |
|-----------------------|-------------------------------|-----------------------------------------|-------------------------------------------|--------------------------------|--------------------------------|-------------------------------------|
| <b>Sex</b>            |                               |                                         |                                           |                                |                                |                                     |
| Male (125)            | 57(45.6)                      | 48(38.9)                                | 9(7.2)                                    | 2(1.6)                         | 12(9.6)                        | 56(44.8)                            |
| Female (270)          | 130(48.1)                     | 97(35.7)                                | 33(12.2)                                  | 8(3.0)                         | 24(8.9)                        | 116(43.0)                           |
| p-value               | .358                          | .357                                    | .089                                      | .337                           | .476                           | .407                                |
| <b>Age</b>            |                               |                                         |                                           |                                |                                |                                     |
| 16-25 (166)           | 60(36.1)                      | 46(27.7)                                | 14(8.4)                                   | 4(2.4)                         | 16(9.6)                        | 90(54.2)                            |

|            |                      |                 |                |          |         |             |                 |
|------------|----------------------|-----------------|----------------|----------|---------|-------------|-----------------|
|            | 26-35 (154)          | 78(50.6)        | 59(38.3)       | 19(12.3) | 3(1.9)  | 15(9.7)     | 61(39.6)        |
|            | 36-45 (51)           | 33(64.7)        | 28(54.9)       | 5(9.8)   | 1(2.0)  | 3(5.9)      | 15(29.4)        |
|            | 46-65 (24)           | 16(66.7)        | 12(50.0)       | 4(16.7)  | 2(8.3)  | 2(8.3)      | 6(25.0)         |
|            | p-value              | <b>&lt;.001</b> | <b>&lt;.01</b> | .518     | .313    | .852        | <b>&lt;.001</b> |
| <b>Job</b> | Nurse (224)          | 116(51.8)       | 88(39.3)       | 28(12.5) | 7(3.1)  | 15(6.7)     | 93(41.5)        |
|            | Lab Technicians (90) | 35(38.9)        | 27(30.0)       | 8(8.9)   | 0(0.0)  | 11(12.2)    | 44(48.9)        |
|            | Medical Doctors (17) | 8(47.1)         | 7(41.2)        | 1(5.9)   | 1(5.9)  | 2(11.8)     | 7(41.2)         |
|            | Dentist (15)         | 4(26.7)         | 2(13.3)        | 2(13.3)  | 0(0.0)  | 4(26.7)     | 7(46.7)         |
|            | Pharmacist (8)       | 3(37.5)         | 2(25.0)        | 1(12.5)  | 1(12.5) | 2(25.0)     | 3(37.5)         |
|            | Auxiliary Staff (41) | 21(51.2)        | 19(46.3)       | 2(4.9)   | 1(2.4)  | 2(4.9)      | 18(43.9)        |
|            | p-value              | .187            | .147           | .687     | .217    | <b>.039</b> | .896            |

Data are n(%); p-value<0.05 is considered significant.

## STROBE (Strengthening The Reporting of OBServational Studies in Epidemiology) Checklist

A checklist of items that should be included in reports of observational studies. You must report the page number in your manuscript where you consider each of the items listed in this checklist. If you have not included this information, either revise your manuscript accordingly before submitting or note N/A.

**Note:** An Explanation and Elaboration article discusses each checklist item and gives methodological background and published examples of transparent reporting. The STROBE checklist is best used in conjunction with this article (freely available on the Web sites of PLoS Medicine at <http://www.plosmedicine.org/>, Annals of Internal Medicine at <http://www.annals.org/>, and Epidemiology at <http://www.epidem.com/>). Information on the STROBE Initiative is available at [www.strobe-statement.org](http://www.strobe-statement.org).

| Section and Item     | Item No. | Recommendation                                                                                                                                                                                                                                                                                                                                                                                                                                                                 | Reported on Page No. |
|----------------------|----------|--------------------------------------------------------------------------------------------------------------------------------------------------------------------------------------------------------------------------------------------------------------------------------------------------------------------------------------------------------------------------------------------------------------------------------------------------------------------------------|----------------------|
| Title and Abstract   | 1        | (a) Indicate the study's design with a commonly used term in the title or the abstract                                                                                                                                                                                                                                                                                                                                                                                         |                      |
|                      |          | (b) Provide in the abstract an informative and balanced summary of what was done and what was found                                                                                                                                                                                                                                                                                                                                                                            |                      |
| <b>Introduction</b>  |          |                                                                                                                                                                                                                                                                                                                                                                                                                                                                                |                      |
| Background/Rationale | 2        | Explain the scientific background and rationale for the investigation being reported                                                                                                                                                                                                                                                                                                                                                                                           |                      |
| Objectives           | 3        | State specific objectives, including any prespecified hypotheses                                                                                                                                                                                                                                                                                                                                                                                                               |                      |
| <b>Methods</b>       |          |                                                                                                                                                                                                                                                                                                                                                                                                                                                                                |                      |
| Study Design         | 4        | Present key elements of study design early in the paper                                                                                                                                                                                                                                                                                                                                                                                                                        |                      |
| Setting              | 5        | Describe the setting, locations, and relevant dates, including periods of recruitment, exposure, follow-up, and data collection                                                                                                                                                                                                                                                                                                                                                |                      |
| Participants         | 6        | (a) <i>Cohort study</i> —Give the eligibility criteria, and the sources and methods of selection of participants. Describe methods of follow-up<br><br><i>Case-control study</i> —Give the eligibility criteria, and the sources and methods of case ascertainment and control selection. Give the rationale for the choice of cases and controls<br><br><i>Cross-sectional study</i> —Give the eligibility criteria, and the sources and methods of selection of participants |                      |
|                      |          | (b) <i>Cohort study</i> —For matched studies, give matching criteria and number of exposed and unexposed<br><br><i>Case-control study</i> —For matched studies, give matching criteria and the number of controls per case                                                                                                                                                                                                                                                     |                      |
| Variables            | 7        | Clearly define all outcomes, exposures, predictors, potential confounders, and effect modifiers. Give diagnostic criteria, if applicable                                                                                                                                                                                                                                                                                                                                       |                      |

| Section and Item             | Item No. | Recommendation                                                                                                                                                                                                                                                                                            | Reported on Page No. |
|------------------------------|----------|-----------------------------------------------------------------------------------------------------------------------------------------------------------------------------------------------------------------------------------------------------------------------------------------------------------|----------------------|
| Data Sources/<br>Measurement | 8*       | For each variable of interest, give sources of data and details of methods of assessment (measurement). Describe comparability of assessment methods if there is more than one group                                                                                                                      |                      |
| Bias                         | 9        | Describe any efforts to address potential sources of bias                                                                                                                                                                                                                                                 |                      |
| Study Size                   | 10       | Explain how the study size was arrived at                                                                                                                                                                                                                                                                 |                      |
| Quantitative Variables       | 11       | Explain how quantitative variables were handled in the analyses. If applicable, describe which groupings were chosen and why                                                                                                                                                                              |                      |
| Statistical Methods          | 12       | (a) Describe all statistical methods, including those used to control for confounding                                                                                                                                                                                                                     |                      |
|                              |          | (b) Describe any methods used to examine subgroups and interactions                                                                                                                                                                                                                                       |                      |
|                              |          | (c) Explain how missing data were addressed                                                                                                                                                                                                                                                               |                      |
|                              |          | (d) <i>Cohort study</i> —If applicable, explain how loss to follow-up was addressed<br><i>Case-control study</i> —If applicable, explain how matching of cases and controls was addressed<br><i>Cross-sectional study</i> —If applicable, describe analytical methods taking account of sampling strategy |                      |
|                              |          | (e) Describe any sensitivity analyses                                                                                                                                                                                                                                                                     |                      |
| <b>Results</b>               |          |                                                                                                                                                                                                                                                                                                           |                      |
| Participants                 | 13*      | (a) Report numbers of individuals at each stage of study—eg numbers potentially eligible, examined for eligibility, confirmed eligible, included in the study, completing follow-up, and analysed                                                                                                         |                      |
|                              |          | (b) Give reasons for non-participation at each stage                                                                                                                                                                                                                                                      |                      |
|                              |          | (c) Consider use of a flow diagram                                                                                                                                                                                                                                                                        |                      |
| Descriptive Data             | 14*      | (a) Give characteristics of study participants (eg demographic, clinical, social) and information on exposures and potential confounders                                                                                                                                                                  |                      |
|                              |          | (b) Indicate number of participants with missing data for each variable of interest                                                                                                                                                                                                                       |                      |
|                              |          | (c) <i>Cohort study</i> —Summarise follow-up time (eg, average and total amount)                                                                                                                                                                                                                          |                      |
| Outcome Data                 | 15*      | <i>Cohort study</i> —Report numbers of outcome events or summary measures over time                                                                                                                                                                                                                       |                      |
|                              |          | <i>Case-control study</i> —Report numbers in each exposure category, or summary measures of exposure                                                                                                                                                                                                      |                      |
|                              |          | <i>Cross-sectional study</i> —Report numbers of outcome events or summary measures                                                                                                                                                                                                                        |                      |

| Section and Item         | Item No. | Recommendation                                                                                                                                                                                               | Reported on Page No. |
|--------------------------|----------|--------------------------------------------------------------------------------------------------------------------------------------------------------------------------------------------------------------|----------------------|
| Main Results             | 16       | (a) Give unadjusted estimates and, if applicable, confounder-adjusted estimates and their precision (eg, 95% confidence interval). Make clear which confounders were adjusted for and why they were included |                      |
|                          |          | (b) Report category boundaries when continuous variables were categorized                                                                                                                                    |                      |
|                          |          | (c) If relevant, consider translating estimates of relative risk into absolute risk for a meaningful time period                                                                                             |                      |
| Other Analyses           | 17       | Report other analyses done—eg analyses of subgroups and interactions, and sensitivity analyses                                                                                                               |                      |
| <b>Discussion</b>        |          |                                                                                                                                                                                                              |                      |
| Key Results              | 18       | Summarise key results with reference to study objectives                                                                                                                                                     |                      |
| Limitations              | 19       | Discuss limitations of the study, taking into account sources of potential bias or imprecision. Discuss both direction and magnitude of any potential bias                                                   |                      |
| Interpretation           | 20       | Give a cautious overall interpretation of results considering objectives, limitations, multiplicity of analyses, results from similar studies, and other relevant evidence                                   |                      |
| Generalisability         | 21       | Discuss the generalisability (external validity) of the study results                                                                                                                                        |                      |
| <b>Other Information</b> |          |                                                                                                                                                                                                              |                      |
| Funding                  | 22       | Give the source of funding and the role of the funders for the present study and, if applicable, for the original study on which the present article is based                                                |                      |

\*Give information separately for cases and controls in case-control studies and, if applicable, for exposed and unexposed groups in cohort and cross-sectional studies.

**Once you have completed this checklist, please save a copy and upload it as part of your submission. DO NOT include this checklist as part of the main manuscript document. It must be uploaded as a separate file.**

# BMJ Open

## Cross-sectional hospital based-study on the sero-prevalence of Hepatitis B virus markers among health care workers, NWR, Cameroon.

|                                 |                                                                                                                                                                                                                                                                                                                                                                                                                                                                                        |
|---------------------------------|----------------------------------------------------------------------------------------------------------------------------------------------------------------------------------------------------------------------------------------------------------------------------------------------------------------------------------------------------------------------------------------------------------------------------------------------------------------------------------------|
| Journal:                        | <i>BMJ Open</i>                                                                                                                                                                                                                                                                                                                                                                                                                                                                        |
| Manuscript ID                   | bmjopen-2020-045716.R1                                                                                                                                                                                                                                                                                                                                                                                                                                                                 |
| Article Type:                   | Original research                                                                                                                                                                                                                                                                                                                                                                                                                                                                      |
| Date Submitted by the Author:   | 09-Jan-2021                                                                                                                                                                                                                                                                                                                                                                                                                                                                            |
| Complete List of Authors:       | Akazong, Etheline; University of Dschang, Department of Biochemistry Tume, Christopher; University of Dschang Faculty of Sciences; University of Bamenda, Department of Biochemistry Ayong, Lawrence; Centre Pasteur Cameroun Njouom, Richard; Centre Pasteur of Cameroon, Kenmoe, Sebastien; Centre Pasteur of Cameroon, Virology Njankouo, Ripa; Centre Pasteur du Cameroun, Virology Unit Kuate, Jules-Roger; University of Dschang Faculty of Sciences, Department of Biochemistry |
| <b>Primary Subject Heading</b>: | Public health                                                                                                                                                                                                                                                                                                                                                                                                                                                                          |
| Secondary Subject Heading:      | Epidemiology, Infectious diseases                                                                                                                                                                                                                                                                                                                                                                                                                                                      |
| Keywords:                       | Epidemiology < INFECTIOUS DISEASES, VIROLOGY, Public health < INFECTIOUS DISEASES, Biochemistry < NATURAL SCIENCE DISCIPLINES                                                                                                                                                                                                                                                                                                                                                          |
|                                 |                                                                                                                                                                                                                                                                                                                                                                                                                                                                                        |

SCHOLARONE™  
Manuscripts

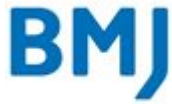

I, the Submitting Author has the right to grant and does grant on behalf of all authors of the Work (as defined in the below author licence), an exclusive licence and/or a non-exclusive licence for contributions from authors who are: i) UK Crown employees; ii) where BMJ has agreed a CC-BY licence shall apply, and/or iii) in accordance with the terms applicable for US Federal Government officers or employees acting as part of their official duties; on a worldwide, perpetual, irrevocable, royalty-free basis to BMJ Publishing Group Ltd ("BMJ") its licensees and where the relevant Journal is co-owned by BMJ to the co-owners of the Journal, to publish the Work in this journal and any other BMJ products and to exploit all rights, as set out in our [licence](#).

The Submitting Author accepts and understands that any supply made under these terms is made by BMJ to the Submitting Author unless you are acting as an employee on behalf of your employer or a postgraduate student of an affiliated institution which is paying any applicable article publishing charge ("APC") for Open Access articles. Where the Submitting Author wishes to make the Work available on an Open Access basis (and intends to pay the relevant APC), the terms of reuse of such Open Access shall be governed by a Creative Commons licence – details of these licences and which [Creative Commons](#) licence will apply to this Work are set out in our licence referred to above.

Other than as permitted in any relevant BMJ Author's Self Archiving Policies, I confirm this Work has not been accepted for publication elsewhere, is not being considered for publication elsewhere and does not duplicate material already published. I confirm all authors consent to publication of this Work and authorise the granting of this licence.

1  
2  
3 **Cross-sectional hospital based-study on the sero-prevalence of Hepatitis B virus**  
4 **markers among health care workers, NWR, Cameroon.**  
5

6 Akazong W. Etheline<sup>1</sup>, Tume Christopher<sup>1,2</sup>, Ayong Lawrence<sup>3</sup>, Njouom Richard<sup>4</sup>, Kenmoe  
7 Sebastien<sup>4</sup>, Njankouo Ripa<sup>4</sup>, Kuate Jules-Roger<sup>1\*</sup>.  
8  
9

10 <sup>1</sup> Department of Biochemistry, University of Dschang  
11

12 <sup>2</sup> Department of Biochemistry, University of Bamenda  
13

14 <sup>3</sup> Malaria unit, Centre Pasteur of Cameroon, Yaoundé, Cameroon  
15

16 <sup>4</sup> Virology unit, Centre Pasteur of Cameroon, Yaoundé, Cameroon  
17

18 Short title: Akazong *et al.*; 2020  
19

20  
21 \*Corresponding Author  
22

23 Kuate Jules-Roger  
24

25 Department of Biochemistry  
26

27 University of Dschang  
28

29 BP 67, Dschang, Cameroon  
30

31 Fax: +237 234 691 506  
32

33 Tel: +237 699 679 135  
34

35 Email: [jules.kuate@univ-dschang.org](mailto:jules.kuate@univ-dschang.org)  
36  
37  
38  
39  
40  
41  
42  
43  
44  
45  
46  
47  
48  
49  
50  
51  
52  
53  
54  
55  
56  
57  
58  
59  
60



## Abstract

**Background:** Hepatitis B virus (HBV) infection is a major public health issue worldwide, with about 257 million people reported to be chronic carriers by the World Health Organization factsheet updated in 2018. HBV can be contracted via direct contact with infected body fluid and infection is almost always asymptomatic. Although healthcare workers (HCWs) are at high risk of HBV infection, little is known about the prevalence of the various HBV markers among HCWs in Cameroon. The present study was taken to evaluate the prevalence of different HBV serological markers among HCWs in the North-West Region of Cameroon.

**Methods:** This cross-sectional hospital based study was carried out between April to September (2017) during which 395 HCWs were recruited. The serum of the HCWs were tested for the presence of HBV core antibody (anti-HBc), Hepatitis B surface antibody (anti-HBs), Hepatitis B e antibody (anti-HBe) and Hepatitis B surface antigen (HBsAg) using Monalisa™ ELISA kits produced by BIO-RAD laboratories. Data was analysed using SPSS version 20.0.

**Results:** Among the 395 participants, 270 (68.4%) of them were females, 187 (47.3%) had been exposed to HBV, 145 (36.7%) had resolved the infection, 42 (10.6%) were current HBV carriers, 10 (2.5%) were infective, 36 (9.1%) were vaccinated and 172 (43.5%) were still susceptible. Exposure to HBV, past infection and susceptibility were significantly associated with age while the rate of vaccination was significantly associated with the job of the HCW in the health facilities.

**Conclusion:** The prevalence of HBV exposure and infection among HCWs obtained in this study was high while the level of vaccination in this at-risk population was low. Adequate steps should be taken to sensitize this population on HBV and the vaccination procedure.

**Keys words:** Hepatitis B Virus, Healthcare Workers, HBsAg, Anti-HBs, Anti-HBc, Anti-HBe.

1  
2  
3 **Abbreviations:** anti-HBc: hepatitis B core antibody, anti-HBs: Hepatitis B surface  
4 antibody, anti-HBe: HBV e antibody, HBsAg: Hepatitis B surface antigen, MD: Medical  
5 doctor, Lab tech: Laboratory technician, HCWs: Health care workers, SRN/SRM: State  
6 Registered Nurse/Midwife, NWR: North West Region, HND: Higher National Diploma,  
7 BSc: Bachelor of Science, HBsAg: Hepatitis B surface antigen, ELISA: Enzyme-linked  
8 immunosorbent assay, CMA: Centre medical d'arrondissement (district medical centres).  
9  
10  
11  
12  
13  
14  
15

16 **Strength:**

- 17  
18  
19  
20  
21  
22  
23  
24  
25  
26  
27  
28  
29  
30  
31  
32  
33  
34  
35  
36  
37  
38  
39  
40  
41  
42  
43  
44  
45  
46  
47  
48  
49  
50  
51  
52  
53  
54  
55  
56  
57  
58  
59  
60
- Monalisa™ ULTRA ELISA kits with 100% sensitivity and specificity of 99.28% was used to determine HBV serological markers.
  - Stratified sampling technique, which permits estimation of population parameters for groups within population was used for sampling.

26 **Limitation:**

- 27  
28  
29  
30  
31  
32  
33  
34  
35  
36  
37  
38  
39  
40  
41  
42  
43  
44  
45  
46  
47  
48  
49  
50  
51  
52  
53  
54  
55  
56  
57  
58  
59  
60
- The anti-HBs titer was not quantified thus the percentage of HCWs considered to be vaccinated in this study is higher than the actual percentage with a protective level of anti-HBs.
  - Liver biopsy was not done to prove the complete clearance of the virus in resolved infection.
  - Serum HBV DNA was not measured since there is no kit available yet to determine this marker.
  - The present study covers a cross-section of health professionals, so caution should be taken while generalizing the results.

## INTRODUCTION

Hepatitis B virus infection is a viral infection that attacks the liver and can cause both acute, self-resolving, and chronic disease (1). The Hepatitis B virus (HBV), made of a partially double stranded DNA belongs to the family of Hepadnaviridae. This virus found in both blood and body fluids of infected persons, can be transmitted to the mucus membrane or blood stream of non-infected persons (1). Infection with HBV is preventable with the presence of a vaccine which confers over 96% protection to recipients (2). According to the WHO fact sheet updated in July 2018, an estimated 257 million people are infected with HBV worldwide and more than 887,000 people died in 2015 due to complications of HBV including cirrhosis and hepatocellular carcinoma (3). The level of hepatitis B varies widely across WHO regions with the WHO African Region and the WHO Western Pacific Region sharing the greatest burden (6.1% and 6.2% of the population respectively). In Cameroon, a sub-Saharan African country, HBV infection is considered hyper-endemic with a prevalence rate estimated at 11.5% (4).

Health-care workers (HCWs) whose job is to care for the sick and injured are often exposed to blood and other body fluids in the course of their work. Consequently, they are at increased risk of infection with blood borne viruses such as Human Immunodeficiency virus (HIV), HBV and Hepatitis C Virus (5). The risk of infection for health workers depend on the prevalence of the disease in the patient population and the nature and the frequency of exposures (6). HCWs when infected, are at risk of transmitting HBV to their patients (6). Because of the risk associated with their occupation, WHO recommends that all non-infected health care workers be vaccinated against HBV (5).

A national survey in Cameroon on the prevalence of HBV among HCWs reported a national sero-prevalence of 8.75% current infection (7) while a recent study carried out among HCWs in this region reported a prevalence of 10.6% (8). Very little work has been done on the various HBV serological markers (anti-HBc, anti-HBs, anti-HBe and HBeAg) to evaluate exposure, natural immunity (past or resolved infection), infectivity, vaccination (acquired immunity) and susceptibility (9,10). In this study, we therefore set out to evaluate the different serological markers associated with HBV infection (anti-HBc, anti-HBs, HBsAg and anti-HBe). These serological markers were used to evaluate the

1  
2  
3 prevalence of exposure, natural immunity, current infection, infectivity, acquired  
4 immunity and susceptibility to HBV among HCWs in our setting. Knowledge on these HBV  
5 epidemiological features can assist in the development of specific programs such as  
6 vaccination campaigns for susceptible HCWs and guide health policy makers in  
7 prioritizing and optimizing treatment of infected and/or infective HCWs. This in turn can  
8 help public health surveillance institutions in our resource-limited setting to optimize the  
9 available resources.

## 16 17 **MATERIALS AND METHODS**

### 18 19 **Study design and setting**

20 This was a cross-sectional hospital-based study conducted between April and September  
21 2017. The study included 22 health facilities in the Bamenda health district (one regional  
22 hospital, three CMAs (Centre medical d'arrondissement), six mission hospitals, five  
23 government health centres and seven private hospitals). Testing stations were set up in  
24 the various wards of the health facilities. Over 70% of HCWs in the various health  
25 facilities were recruited for this study.

### 31 32 33 **Case definition**

34 In this study, exposure was defined as being tested positive for the anti-HBc only, natural  
35 immunity (past/resolved infection) was being tested positive for anti-HBc and anti-HBs,  
36 current infection was defined as being tested positive for HBsAg, infective subjects were  
37 those who were tested positive for HBsAg and negative for anti-HBe, vaccinated subjects  
38 were those who were tested positive for anti-HBs only while susceptible (naïve) subjects  
39 were those who were negative for all HBV serological markers. Being tested positive  
40 implies they were reactive for the marker of interest.

### 41 42 43 44 45 46 47 48 49 **Sample size and justification**

50 Sample size was determined using the formula proposed by Scott Smith for determining  
51 population proportion sample size (11):  $X=Z\text{-score} \times SD \times (1-SD)/MOE$ . The proportion  
52 of HCWs in the NWR was obtained from a registry which published the national  
53 proportions of HCWs per region in 2015 (12). The confidence level was 95%, giving a Z-  
54 score of 1.96, a margin of error (MOE) of  $\pm 5$  and an SD of 0.5. The calculated sample size  
55 using this formula was 385 persons.

## Sample collection

All HCWs present in the Bamenda Health District (BHD) during the study were invited to participate in this study. HCWs who consented to the study were asked to sign a consent form, fill a self-administered questionnaire after which 4ml of blood was collected from them into a red cap (dry) tube. Identification number was used to link participant's laboratory results and the questionnaire. A standardized questionnaire designed by the researcher was used to collect socio-demographic data and HCWs category. HCWs included medical doctors, nurses, laboratory technicians, dentist, pharmacist and hospital auxiliary staff (cleaners, carriers, launders).

## HBV serology

Monalisa™ ELISA kits produced by BIO-RAD laboratories with sensitivity and specificity greater than 99% were used to qualitatively determine the different HBV serological markers. Monalisa™ HBsAg ULTRA ELISA kit was used to test for the presence of HBsAg, Monalisa™ Anti-HBs PLUS ELISA kit (BIORAD, Marnes- La-Coquette-France), was used to test for the presence of anti-HBs, Monalisa™ Anti-HBc PLUS ELISA kit was used to test for the presence of anti-HBc while Monalisa™ HBe Ag-Ab PLUS ELISA kit (BIORAD, Marnes- La-Coquette-France) was used to test for the presence of anti-HBe.

## Statistical analysis

Statistical analysis was performed using the Statistical software IBM® SPSS® Statistics Version 22.0 for mac. Continuous data were expressed as median values with 1st and 3rd interquartile ranges (IQR). Categorical data were expressed as percentages. Pearson's  $\chi^2$  ( $p < .05$ ) was used to assess the significance among study variables. Odd ratio was calculated using binary logistic regression.

## RESULTS

### Characteristics of study population

A total of 395 health care workers (HCWs) from the different hospitals in this region participated in the study. Among these, 68.4% ( $n=270$ ) were women (Table 1). The (16-25 years old age group represented 42.0% ( $n=166$ ) of the study population. The median

1  
2  
3 age of the study population was 27.0 years (IQR, 23 - 32 years). Nurses were the most  
4 represented in the HCWs category, (n=224, 56.3%).  
5  
6  
7

### 8 **Exposure to HBV**

9  
10 Anti-HBc was used to determine exposure to HBV (  
11  
12  
13  
14  
15  
16  
17  
18  
19  
20  
21  
22  
23  
24  
25  
26  
27  
28  
29  
30  
31  
32  
33  
34  
35  
36  
37  
38  
39  
40  
41  
42  
43  
44  
45  
46  
47  
48  
49  
50  
51  
52  
53  
54  
55  
56  
57  
58  
59  
60

For peer review only

1  
2  
3 Table 2). Of the 395 health care workers who participated in this study, 187 (47.3%) were  
4 tested positive for anti-HBc. A statistically significant association was observed between  
5 exposure and age (p-value<.001). Exposure to HBV significantly increased with age and  
6  
7 HCWs belonging to the (46-65) years age group had a greater than 3.5 times probability  
8  
9 of being exposed to HBV when compared to those belonging to the (16-25) years age  
10  
11 group. There was no significant association between sex, HCWs category and exposure.  
12  
13 However, exposure was relatively lower among dentist (n=4, 26.7%) than among other  
14  
15 HCWs. Prevalence of exposure was similar between sexes.  
16  
17  
18

### 19 **Natural immunity against HBV (HBV clearance)**

20 A combination of anti-HBc and anti-HBs was used to evaluate natural immunity against  
21  
22 HBV (past/resolved infection) (  
23  
24  
25  
26  
27  
28  
29  
30  
31  
32  
33  
34  
35  
36  
37  
38  
39  
40  
41  
42  
43  
44  
45  
46  
47  
48  
49  
50  
51  
52  
53  
54  
55  
56  
57  
58  
59  
60

1  
2  
3 Table 2). One hundred and forty-five (77.5%) HCWs who had come in contact with HBV  
4 had effectively cleared the virus. Natural immunity was significantly associated with age  
5 (p-value<.05), and was highest in the (36-45) year age group (n=27, 54.0%). HCWs  
6 belonging to the (36-45) year age group showed a 3 times significantly greater  
7 probability of resolving the infection when compared to HCWs belonging to the (16-25)  
8 year age group. There was no significant correlation between ability to clear the hepatitis  
9 B virus, sex and HCWs category.  
10  
11  
12  
13  
14  
15  
16

### 17 **Current infection to HBV**

18  
19 HBsAg was detected in 42 of the 395 HCWs (10.6%) (Table 3). There was no statistically  
20 significant association between sex, age, HCWs category and current infection. HBsAg  
21 infection was higher among females (n=33, 12.2%; 1.795, 95%CI[0.831-3.875]) than  
22 among males (n=9, 7.2%). Majority of HBsAg infected HCWs belonged to the (46-65) year  
23 age group (n=4, 16.7%) and were dentist (n=2, 13.3%).  
24  
25  
26  
27  
28  
29

### 30 **HBV infectivity among HCWs**

31  
32 The presence of HBsAg and the absence of anti-HBe were used to evaluate HBV infectivity  
33 (Table 3). Among the 10.4% of HCWs infected with HBV, 23.8% (n=10) of them were  
34 infective. There was no significant association between sex, age, job and being HBV  
35 infective. More females were infective (n=8, 3.0%) compared to males (n=2, 1.6%). The  
36 (46-65) year age group recorded the highest prevalence of infective HCWs (n=2, 8.3%)  
37 and were pharmacist (n=1, 12.5%).  
38  
39  
40  
41  
42  
43

### 44 **Acquired immunity (vaccinated) HCWs**

45  
46 The absence of anti-HBc and the presence of anti-HBs were used to determine vaccinated  
47 HCWs (  
48  
49  
50  
51  
52  
53  
54  
55  
56  
57  
58  
59  
60



1  
2  
3 Table 2). Among the 208 HCWs who had never been exposed to HBV, 17.3% (n=36) of  
4 them were vaccinated. This gave us a general vaccination prevalence of 9.1% among the  
5 395 study participants. There was a statistically significant association between being  
6 vaccinated and HCWs category (p-value<.05). Nurses (n=15, 6.7%; 0.197, 95%CI[0.056-  
7 0.695], p-value=.012) and auxiliary staff (2, 4.9%; 0.141, 95%CI[0.023-0.874], p-  
8 value=.036) had a significantly lower probability of being vaccinated when compared to  
9 dentist. Males and females had a similar prevalence of acquired immunity (12 [9.6%]  
10 males and 24 [8.9%] females). Most of those vaccinated belonged to the (26-35) year age  
11 group (n=15, 9.7%) and were dentist (n=4, 26.7%). However, there was no significant  
12 association between acquired immunity, sex and job.  
13  
14  
15  
16  
17  
18  
19  
20  
21  
22

### 23 **Susceptible HCWs**

24 Susceptibility was determined by the absence of anti-HBc, anti-HBs and HBsAg in serum  
25 (Table 3). Among the 395 HCWs who participated in this study, 43.5% (n=172) of them  
26 were still susceptible to HBV. A statistically significant association was observed between  
27 age and susceptibility (p-value<.001). Susceptibility significantly decreased with age and  
28 was highest in the (16-25) year age group (n=90, 54.2%). There was no significant  
29 association between susceptibility, sex and HCWs category.  
30  
31  
32  
33  
34  
35  
36

### 37 **DISCUSSION**

38 Hepatitis B virus is a major cause of Chronic Hepatitis, Liver Cirrhosis and Hepatocellular  
39 Carcinoma. As a viral infection, which can be transmitted via percutaneous and mucosal  
40 exposure to infective body fluids, HBV stands as a serious nosocomial infection in health  
41 care settings. The current study, which aimed at evaluating the sero-prevalence of the  
42 different HBV serological profiles among HCWs in the NWR of Cameroon showed a high  
43 HBV burden in this population. Serological testing revealed that the prevalence of HBV  
44 exposure was 47.3%, past infection was 36.7%, current infection was 10.6%, infectivity  
45 was 2.5%, acquired immunity was 9.1% and susceptibility was 43.5%. A number of  
46 epidemiological and cross-sectional studies have reported marked variation in the  
47 prevalence of the various HBV serological profiles among HCWs within and out of the  
48 country (7–10,13–15). HBV prevalence in this at-risk group seems to vary with the HBV  
49 prevalence in the general population.  
50  
51  
52  
53  
54  
55  
56  
57  
58  
59  
60

1  
2  
3 The high prevalence of HBV exposure (47.3%) obtained in the current study is relatively  
4 higher than the 19% obtained by Tasilong *et al* in Yaoundé (the capital of Cameroon) in  
5 2016 (9). This difference in prevalence could be because of the difference in the  
6 diagnostic technique used, given that Tasilong *et al* worked with the one-step, rapid strip  
7 test which has a relatively lower sensitivity and specificity when compared to the ELISA  
8 technique used in this study (16–19). The high rate of HBV exposure among HCWs in this  
9 study may be related to the low level of knowledge on the route of HBV transmission  
10 among HCWs in this population recently estimated to be 67.6% (8).

11  
12  
13 The prevalence of HBV infection obtained in this study (10.6%) was higher than the  
14 8.75% obtained by Ndongo *et al.* in their national survey among HCWs in Cameroon (7).  
15 The difference in prevalence could be justified by the fact that the national survey focused  
16 on the regional hospital (which represents the government reference hospital in this  
17 region) and the difference in the technique used (rapid strip test). A similar study carried  
18 out in a local hospital in Yaoundé reported a comparable prevalence among HCWs [11%]  
19 (9) while Lorient *et al.*, working in the Extreme Nord Region of Cameroon recorded a  
20 prevalence of 18% (15). This alternating prevalence, could be a reflection of the cultural  
21 and climatic differences existing between the different ethnic groups alongside the  
22 diverse geographical scenery of the country (7).

23  
24  
25 Prevalence of exposure and natural immunity were significantly associated and seem to  
26 increase with age. In effect, it is known that the clinical course and outcome of HBV  
27 infection is greatly influenced by age at infection, the level of HBV replication and the host  
28 immune status (20). According to Ott J. *et al.*, the decrease in exposure with age could be  
29 explained by the expanded immunization between 1990 to 2005 which led to a decrease  
30 in HBV infections in most regions particularly Central sub-Saharan Africa (21).  
31 Furthermore, risk of transmission might have changed over time due to increased  
32 awareness and precautions like wearing of gloves, frequent hand washing and use of  
33 safety needles.

34  
35  
36 The prevalence of infectivity was 2.5% for all the HCWs and 23% for HBV infected HCWs.  
37 The persistence of HBeAg in blood is always associated with progress towards a liver  
38 disease as well as an increase probability of transmitting the virus. Even though there

1  
2  
3 exist a management guide proposed by WHO in 2015, this high prevalence of infectivity  
4 among infected HCWs could be because of the elevated cost involve in managing the  
5 disease (2).  
6  
7  
8  
9

10 According to the 'CDC updates HBV vaccination guidelines for HCWs' (2014), healthcare  
11 personnel should be vaccinated against hepatitis B virus (HBV) before exposure to blood  
12 or body fluids and should receive serologic testing to assess for antibody against the virus  
13 (22). Still, just 9.1% of HCWs in our setting showed acquired immunity. According to  
14 Ndongo *et al.*, auxiliary staff were the least likely to be vaccinated compared to the other  
15 HCWs accounting for the low prevalence of acquired immunity among them (7). HCWs  
16 belonging to the (16-25) year age group were the most vaccinated. This might be because  
17 some institutions now ask for proof of HBV vaccination in none-infected individuals  
18 before hire or matriculation. Overall, the low prevalence of HCWs vaccinated against HBV  
19 might either be due to inappropriate sensitization on HBV or the cost of the HBV vaccine.  
20  
21  
22  
23  
24  
25  
26  
27  
28  
29

30 HBV susceptibility in our study was high (43.5%) and was inversely proportional to age.  
31 The statistically significant association between age and susceptibility to HBV might be  
32 explained by the decrease in childhood and maternal transmission of HBV due to the  
33 expanded immunization between 1990 to 2005 explained above (21). Unfortunately, this  
34 infant vaccine cannot provide adequate protection in adulthood increasing the number  
35 of susceptible HCWs. More so, duration in the hospital increases with age. Thus, the  
36 younger HCWs whose duration in healthcare settings is less than that of older HCWs and  
37 who still have a longer period to work in this setting have not been exposed to HBV  
38 nosocomial risk factors like older HCWs and have a higher risk of eventually getting  
39 exposed when compared to older HCWs.  
40  
41  
42  
43  
44  
45  
46  
47  
48

## 49 **CONCLUSION**

50 This study revealed a considerable burden (10.6% current infection) of HBV infection in  
51 the Bamenda health District, North West Region of Cameroon. Among the infected HCWs,  
52 23.8% of them were infective. These infective HCWs are at risk of infecting their patients.  
53 Subsidizing management of HBV for HCWs might reduce the prevalence of infective  
54 HCWs and consequently the probability of HBV nosocomial infection from HCWs to their  
55 patients. Prevalence of HBV vaccination was low (9.1%) while prevalence of exposure  
56  
57  
58  
59  
60

1  
2  
3 (47.3%) and susceptibility (43.5%) to HBV were high. There is thus a high need for  
4 sensitization of HCWs in this area on HBV transmission and prevention. The sensitisation  
5 along with an effective and massive vaccination campaign should be carried out in this  
6 region not only among HCWs but in the population in general.  
7  
8  
9

## 10 11 12 13 **DECLARATIONS**

14  
15  
16  
17 **Statement of Ethics:** Ethical clearance for the study was obtained from the National  
18 Ethics Committee of Cameroon (N°2017/02/871/CE/CNERSH/SP). Authorization to  
19 carry out research in the NWR was obtained from the regional delegation. Authorizations  
20 to access different hospitals were obtained from the directors or the in-charge of the  
21 hospitals. Authorization to access health centers was obtained from the District medical  
22 officer (DMO) and the chief of centers of the health facilities in this region. Written  
23 informed consent was obtained from each participant.  
24  
25  
26  
27  
28  
29

30  
31 **Consent for publication:** Not applicable.  
32  
33

34  
35 **Patients and public involvement:** Not applicable.  
36  
37

38  
39 **Availability of data and material:** Data are available in a public, open access repository  
40 (<https://doi.org/10.6084/m9.figshare.13503231.v1>).  
41  
42

43  
44 **Competing interests:** The authors declare that they have no competing interests.  
45  
46

47  
48 **Funding:** Not applicable.  
49

50  
51 **Authors' contribution:** AE and TC designed the study; AE and NRipa performed the  
52 experiments; AE drafted the manuscript; TC, NR, AL, KJR and KS were involved in editing  
53 the manuscript; AE and KS performed the statistical analysis. All authors read and  
54 approved the final manuscript.  
55  
56  
57  
58  
59  
60

**Acknowledgement:** All HCWs in the Bamenda Health District who consented to participate in this study; Dr. Akassong D. Dinga Wonanke for helping with the purchase of material, Mr Fondoh Victor for his help at the start of this work, RHB for permitting the blood samples to be stored in the RHB laboratory freezer during sample collection.

## Reference

1. Kathleen D. Hepatitis B: causes, symptoms and treatment. Medical News Today. 2018.
2. World Health Organization. Myths and facts about immunization,. WHO Regional Office for Europe; 2015.
3. World Health Organisation. Updated factsheet: Hepatitis B. In Geneva: WHO; 2020.
4. Njouom R, Tejiokem M, Texier G, Fontanet A. O-02: Prevalence of hepatitis B, hepatitis C and hepatitis D virus infections in Cameroon: results from a national population based survey (The ANRS 12289 project). J Viral Hepat. 2015;22(S2):1-2.
5. World Health Organisation. Health Care Worker Safety. In Geneva: WHO; 2003.
6. Jessica D, Kyle B, Costi D. Hepatitis B in health care workers: transmission events and guidance management. World J Hepat. 2015;7(3):488-97.
7. Ndongo CB, Eteki L, Siedner M, Mbaye R, Chen J, Ntone R, et al. Prevalence and vaccination coverage of Hepatitis B among healthcare workers in Cameroon: A national seroprevalence survey. Journal of Viral Hepatitis. 2018 Dec 1;25(12):1582-7.
8. Akazong W E, Tume C, Njouom R, Ayong L, Fondoh V, Kuate J-R. Knowledge, attitude and prevalence of hepatitis B virus among healthcare workers: a cross-sectional, hospital-based study in Bamenda Health District, NWR, Cameroon. BMJ Open. 2020 Mar;10(3):e031075.
9. Tatsilong HOP, Noubiap JJN, Nansseu JRN, Aminde LN, Bigna JJR, Ndze VN, et al. Hepatitis B infection awareness, vaccine perceptions and uptake, and serological profile of a group of health care workers in Yaoundé, Cameroon. BMC Public Health

- [Internet]. 2016 Dec [cited 2018 Dec 11];16(1). Available from: <http://bmcpublikehealth.biomedcentral.com/articles/10.1186/s12889-016-3388-z>
10. Chinese Military Medical Experts Group in Sierra Leone, Qin Y-L, Li B, Zhou Y-S, Zhang X, Li L, et al. Prevalence and associated knowledge of hepatitis B infection among healthcare workers in Freetown, Sierra Leone. *BMC Infectious Diseases* [Internet]. 2018 Dec [cited 2019 Aug 17];18(1). Available from: <https://bmcinfectdis.biomedcentral.com/articles/10.1186/s12879-018-3235-1>
  11. Smith SM. Determining-Sample-Size. *qualtrics*. 2013;7.
  12. Tandi TE, Cho Y, Akam AJ-C, Afoh CO, Ryu SH, Choi MS, et al. Cameroon public health sector: shortage and inequalities in geographic distribution of health personnel. *International Journal for Equity in Health* [Internet]. 2015 Dec [cited 2019 Feb 26];14(1). Available from: <http://www.equityhealthj.com/content/14/1/43>
  13. Mueller A, Stoetter L, Kalluvya S, Stich A, Majinge C, Weissbrich B, et al. Prevalence of hepatitis B virus infection among health care workers in a tertiary hospital in Tanzania. *BMC Infectious Diseases* [Internet]. 2015 [cited 2018 Dec 11];15(1). Available from: <http://bmcinfectdis.biomedcentral.com/articles/10.1186/s12879-015-1129-z>
  14. Fritzsche C, Becker F, Hemmer CJ, Riebold D, Klammt S, Hufert F, et al. Hepatitis B and C: neglected diseases among health care workers in Cameroon. *Transactions of The Royal Society of Tropical Medicine and Hygiene*. 2013 Mar;107(3):158–64.
  15. Loriette M, Birguel J, Damza R, Ratoua M, Karsikam S, Sobnangou JJ, et al. An experience of hepatitis B control in a rural area in Far North Cameroon. *Médecine et Santé Tropicales*. 2015;(4):422–427.
  16. Erhabor O, Kwaifa I, Bayawa A, Isaac Z, Dorcas I, Sani I. Comparison of ELISA and Rapid Screening Techniques for the Detection of HBsAg among Blood Donors in Usmanu Danfodiyo University Teaching Hospital Sokoto, North Western Nigeria [Internet]. *Journal of Blood & Lymph*. 2014 [cited 2018 Dec 11]. Available from: <https://www.omicsonline.org/open-access/comparison-of-elisa-and-rapid-screening-techniques-for-the-detection-of-hbsag-among-blood-donors-in-usmanu->

- 1  
2  
3 danfodiyo-university-teaching-hospital-sokoto-north-western-nigeria-2165-  
4 7831.1000124.php?aid=30523  
5  
6  
7  
8 17. Hayder I, Ahmed W, Alam SE. Comparison of Different ICT Kits for HBsAg and Anti  
9 HCV Using Gold Standard ELISA. *Pak J Med Res.* 2012;51(3):72–6.  
10  
11  
12 18. Cruz HM, Scalioni L de P, Paula VS de, Miguel JC, Ó KMR do, Milagres FAP, et al. Poor  
13 sensitivity of rapid tests for the detection of antibodies to the hepatitis B virus:  
14 implications for field studies. *Memórias do Instituto Oswaldo Cruz.* 2017 Jan  
15 30;112(3):209–13.  
16  
17  
18 19. Cruz H, Scalioni L, Vanessa S, Elisangela F, Kycia M, Milagres F, et al. Evaluating  
19 HBsAg rapid test performance for different biological samples from low and high  
20 infection rate settings & populations. *BMC Infectious Diseases.* 2015;15:548–58.  
21  
22  
23 20. Fattovich G, Zagni I, Scattolini C. Natural History of Hepatitis B and Prognostic  
24 Factors of Disease Progression. In: Management of patients with viral hepatitis. In:  
25 Marcellin P, editor. Paris: Hepatitis B; 2004. p. 203–20.  
26  
27  
28 21. Ott JJ, Stevens GA, Groeger J, Wiersma ST. Global epidemiology of hepatitis B virus  
29 infection: New estimates of age-specific HBsAg seroprevalence and endemicity.  
30 *Vaccine.* 2012 Mar;30(12):2212–9.  
31  
32  
33 22. Centers for Disease Control and Prevention. CDC updates HBV vaccination  
34 guidelines for HCWs - The Clinical Advisor [Internet]. *Clinical Advisor.* 2014 [cited  
35 2018 Dec 11]. Available from: [https://www.clinicaladvisor.com/web-](https://www.clinicaladvisor.com/web-exclusives/cdc-updates-hbv-vaccination-guidelines-for-hcws/article/327757/#)  
36 [exclusives/cdc-updates-hbv-vaccination-guidelines-for-hcws/article/327757/#](https://www.clinicaladvisor.com/web-exclusives/cdc-updates-hbv-vaccination-guidelines-for-hcws/article/327757/#)  
37  
38  
39  
40  
41  
42  
43  
44  
45  
46  
47  
48  
49  
50  
51

52 Table 1: Baseline characteristics of the study population  
53

| Variables  | Frequency<br>(395) | Percentage<br>(100%) |
|------------|--------------------|----------------------|
| <b>Sex</b> |                    |                      |

|                      |     |      |
|----------------------|-----|------|
| Male                 | 125 | 31.6 |
| Female               | 270 | 68.4 |
| <b>Age Intervals</b> |     |      |
| 16-25                | 166 | 42.0 |
| 26-35                | 155 | 39.2 |
| 36-45                | 50  | 12.7 |
| 46-65                | 24  | 6.1  |
| <b>Job</b>           |     |      |
| Nurses               | 224 | 56.7 |
| Lab Technicians      | 90  | 22.8 |
| Medical Doctors      | 17  | 4.3  |
| Dentist              | 15  | 3.8  |
| Pharmacist           | 8   | 2.0  |
| Auxiliary Staff      | 41  | 10.4 |

Data are n(%)



Table 2: Distribution of HBV profile group (n=395)

| Variables n(%) |                        | Exposure 187(47.3) |                        |                | Past Infection 145(36.7) |                         |                | Vaccination 36(9.1) |                        |                |
|----------------|------------------------|--------------------|------------------------|----------------|--------------------------|-------------------------|----------------|---------------------|------------------------|----------------|
|                |                        | n (%)              | OR (95% CI)            | P <sup>b</sup> | n (%)                    | OR (95% CI)             | P <sup>b</sup> | n (%)               | OR (95% CI)            | P <sup>b</sup> |
| Sex            | Male (n=125)           | 57(45.6)           | 1                      |                | 48(38.4)                 | 1                       |                | 12(9.6)             | 1                      |                |
|                | Female (n=270)         | 130(48.1)          | 1.108<br>(0.724-1.695) | .637           | 97(35.9)                 | 0.899<br>(0.581-1.394)  | .635           | 24(8.9)             | 0.919<br>(0.444-1.902) | .819           |
|                | p-value                | .358               |                        |                | .357                     |                         |                | .476                |                        |                |
| Age            | 16-25 (n=166)          | 60(36.1)           | 1                      |                | 46(27.7)                 | 1                       |                | 16(9.6)             | 1                      |                |
|                | 26-35 (n=155)          | 79(51.0)           | 1.836<br>(1.175-2.870) | <b>.008</b>    | 60(38.7)                 | 1.648<br>(1.031-2.634)  | <b>.037</b>    | 15(9.7)             | 1.004<br>(0.479-2.108) | .991           |
|                | 36-45 (n=50)           | 32(64.0)           | 3.141<br>(1.626-6.068) | <b>.001</b>    | 27(54.0)                 | 3.062<br>(1.596-5.877)  | <b>.001</b>    | 3(6.0)              | 0.598<br>(0.167-2.143) | .430           |
|                | 46-65 (n=24)           | 16(66.7)           | 3.533<br>(1.428-8.741) | <b>.006</b>    | 12(50.0)                 | 2.609<br>(1.094-6.223)  | <b>.031</b>    | 2(8.3)              | 0.852<br>(0.183-3.962) | .838           |
|                | p-value                | <b>&lt;.001</b>    |                        |                | <b>.003</b>              |                         |                | .869                |                        |                |
| Job            | Dentist (n=15)         | 4(26.7)            | 1                      |                | 2(13.3)                  | 1                       |                | 4(26.7)             | 1                      |                |
|                | Lab Technicians (n=90) | 35(38.9)           | 1.750<br>(0.516-5.929) | .369           | 27(30.0)                 | 2.786<br>(0.588-13.197) | .197           | 11(12.2)            | 0.383<br>(0.104-1.414) | .150           |
|                | Medical Doctors (n=17) | 8(47.1)            | 2.444<br>(.552-10.833) | .239           | 7(41.2)                  | 4.550<br>(0.771-26.835) | .094           | 2(11.8)             | 0.367<br>(0.057-2.372) | .292           |
|                | Nurse (n=224)          | 116(51.8)          | 2.954<br>(0.913-9.555) | .071           | 88(39.3)                 | 4.206<br>(0.927-19.090) | .063           | 15(6.7)             | 0.197<br>(0.056-0.695) | <b>.012</b>    |
|                | Pharmacist (n=8)       | 3(37.5)            | 1.650                  | .592           | 2(25.0)                  | 2.167                   | .488           | 2(25.0)             | 0.917                  | .931           |

|  |                        |          |                         |      |          |                         |             |             |                        |             |
|--|------------------------|----------|-------------------------|------|----------|-------------------------|-------------|-------------|------------------------|-------------|
|  |                        |          | (0.264-10.313)          |      |          | (0.244-19.276)          |             |             | (0.128-6.556)          |             |
|  | Auxiliary Staff (n=41) | 21(51.2) | 2.887<br>(0.789-10.573) | .109 | 19(46.3) | 5.614<br>(1.122-28.092) | <b>.036</b> | 2(4.9)      | 0.141<br>(0.023-0.874) | <b>.035</b> |
|  | p-value                | .187     |                         |      | .147     |                         |             | <b>.039</b> |                        |             |

Data are n(%); p-value<.05 is considered significant; OR: odd ratio.

Table 3: Distribution of HBV profile group (n=395)

| Variables n(%) |                | Current Infection 42(10.6) |                        |                | Infectivity 10(2.5) |                         |                | Susceptibility 172(43.5) |                        |                |
|----------------|----------------|----------------------------|------------------------|----------------|---------------------|-------------------------|----------------|--------------------------|------------------------|----------------|
|                |                | n (%)                      | OR (95% CI)            | P <sup>b</sup> | n (%)               | OR (95% CI)             | P <sup>b</sup> | n (%)                    | OR (95% CI)            | P <sup>b</sup> |
| Sex            | Male (n=125)   | 9(7.2)                     | 1                      |                | 2(1.6)              | 1                       |                | 56(44.8)                 | 1                      |                |
|                | Female (n=270) | 33(12.2)                   | 1.795<br>(0.831-3.875) | .136           | 8(3.0)              | 1.878<br>(0.393-8.974)  | .430           | 116(43.0)                | 0.928<br>(0.606-1.422) | .732           |
|                | p-value        | .089                       |                        |                | .337                |                         |                | .407                     |                        |                |
| Age            | 16-25 (n=166)  | 14(8.4)                    | 1                      |                | 4(2.4)              | 1                       |                | 90(54.2)                 | 1                      |                |
|                | 26-35 (n=155)  | 19(12.3)                   | 1.517<br>(0.732-3.141) | .262           | 3(1.9)              | 0.799<br>(0.176-3.630)  | .772           | 61(39.4)                 | 0.548<br>(0.352-0.854) | <b>.008</b>    |
|                | 36-45 (n=50)   | 5(10.0)                    | 1.206<br>(0.412-3.531) | .732           | 1(2.0)              | 0.827<br>(0.090-7.568)  | .866           | 15(30.0)                 | 0.362<br>(0.184-0.713) | <b>.003</b>    |
|                | 46-65 (n=24)   | 4(16.7)                    | 2.171<br>(0.651-7.246) | .207           | 2(8.3)              | 3.682<br>(0.637-21.290) | .145           | 6(25.0)                  | 0.281<br>(0.106-0.745) | <b>.011</b>    |
|                | p-value        | .529                       |                        |                | .313                |                         |                | <b>&lt;.001</b>          |                        |                |
| Job            | Dentist (n=15) | 2(13.3)                    | 1                      |                | 0(0.0)              | -                       |                | 7(46.7)                  | 1                      |                |

|                        |          |                         |      |         |                          |      |          |                        |      |
|------------------------|----------|-------------------------|------|---------|--------------------------|------|----------|------------------------|------|
| Lab Technicians (n=90) | 8(8.9)   | 0.634<br>(0.121-3.323)  | .590 | 0(0.0)  | -                        |      | 44(48.9) | 1.093<br>(0.366-3.269) | .873 |
| Medical Doctors (n=17) | 1(5.9)   | 0.406<br>(0.033-4.997)  | .482 | 1(5.9)  | 2.500<br>(0.147-42.440)  | .526 | 7(41.2)  | 0.800<br>(0.197-3.246) | .755 |
| Nurse (n=224)          | 28(12.5) | 0.929<br>(0.199-4.333)  | .925 | 7(3.1)  | 1.290<br>(0.155-10.774)  | .814 | 93(41.5) | 0.811<br>(0.284-2.315) | .696 |
| Pharmacist (n=8)       | 1(12.5)  | 0.929<br>(0.071-12.136) | .955 | 1(12.5) | 5.714<br>(0.319-102.386) | .236 | 3(37.5)  | 0.686<br>(0.119-3.963) | .673 |
| Auxiliary Staff (n=41) | 2(4.9)   | 0.333<br>(0.043-2.610)  | .295 | 1(2.4)  | 1                        |      | 18(43.9) | 0.894<br>(0.273-2.932) | .854 |
| p-value                | .687     |                         |      | .217    |                          |      | .896     |                        |      |

Data are n(%); p-value<.05 is considered significant; OR: odd ratio.

## STROBE (Strengthening The Reporting of OBServational Studies in Epidemiology) Checklist

A checklist of items that should be included in reports of observational studies. You must report the page number in your manuscript where you consider each of the items listed in this checklist. If you have not included this information, either revise your manuscript accordingly before submitting or note N/A.

**Note:** An Explanation and Elaboration article discusses each checklist item and gives methodological background and published examples of transparent reporting. The STROBE checklist is best used in conjunction with this article (freely available on the Web sites of PLoS Medicine at <http://www.plosmedicine.org/>, Annals of Internal Medicine at <http://www.annals.org/>, and Epidemiology at <http://www.epidem.com/>). Information on the STROBE Initiative is available at [www.strobe-statement.org](http://www.strobe-statement.org).

| Section and Item     | Item No. | Recommendation                                                                                                                                                                                                                                                                                                                                                                                                                                                                 | Reported on Page No. |
|----------------------|----------|--------------------------------------------------------------------------------------------------------------------------------------------------------------------------------------------------------------------------------------------------------------------------------------------------------------------------------------------------------------------------------------------------------------------------------------------------------------------------------|----------------------|
| Title and Abstract   | 1        | (a) Indicate the study's design with a commonly used term in the title or the abstract                                                                                                                                                                                                                                                                                                                                                                                         |                      |
|                      |          | (b) Provide in the abstract an informative and balanced summary of what was done and what was found                                                                                                                                                                                                                                                                                                                                                                            |                      |
| <b>Introduction</b>  |          |                                                                                                                                                                                                                                                                                                                                                                                                                                                                                |                      |
| Background/Rationale | 2        | Explain the scientific background and rationale for the investigation being reported                                                                                                                                                                                                                                                                                                                                                                                           |                      |
| Objectives           | 3        | State specific objectives, including any prespecified hypotheses                                                                                                                                                                                                                                                                                                                                                                                                               |                      |
| <b>Methods</b>       |          |                                                                                                                                                                                                                                                                                                                                                                                                                                                                                |                      |
| Study Design         | 4        | Present key elements of study design early in the paper                                                                                                                                                                                                                                                                                                                                                                                                                        |                      |
| Setting              | 5        | Describe the setting, locations, and relevant dates, including periods of recruitment, exposure, follow-up, and data collection                                                                                                                                                                                                                                                                                                                                                |                      |
| Participants         | 6        | (a) <i>Cohort study</i> —Give the eligibility criteria, and the sources and methods of selection of participants. Describe methods of follow-up<br><br><i>Case-control study</i> —Give the eligibility criteria, and the sources and methods of case ascertainment and control selection. Give the rationale for the choice of cases and controls<br><br><i>Cross-sectional study</i> —Give the eligibility criteria, and the sources and methods of selection of participants |                      |
|                      |          | (b) <i>Cohort study</i> —For matched studies, give matching criteria and number of exposed and unexposed<br><br><i>Case-control study</i> —For matched studies, give matching criteria and the number of controls per case                                                                                                                                                                                                                                                     |                      |
| Variables            | 7        | Clearly define all outcomes, exposures, predictors, potential confounders, and effect modifiers. Give diagnostic criteria, if applicable                                                                                                                                                                                                                                                                                                                                       |                      |

| Section and Item             | Item No. | Recommendation                                                                                                                                                                                                                                                                                                    | Reported on Page No. |
|------------------------------|----------|-------------------------------------------------------------------------------------------------------------------------------------------------------------------------------------------------------------------------------------------------------------------------------------------------------------------|----------------------|
| Data Sources/<br>Measurement | 8*       | For each variable of interest, give sources of data and details of methods of assessment (measurement). Describe comparability of assessment methods if there is more than one group                                                                                                                              |                      |
| Bias                         | 9        | Describe any efforts to address potential sources of bias                                                                                                                                                                                                                                                         |                      |
| Study Size                   | 10       | Explain how the study size was arrived at                                                                                                                                                                                                                                                                         |                      |
| Quantitative Variables       | 11       | Explain how quantitative variables were handled in the analyses. If applicable, describe which groupings were chosen and why                                                                                                                                                                                      |                      |
| Statistical Methods          | 12       | (a) Describe all statistical methods, including those used to control for confounding                                                                                                                                                                                                                             |                      |
|                              |          | (b) Describe any methods used to examine subgroups and interactions                                                                                                                                                                                                                                               |                      |
|                              |          | (c) Explain how missing data were addressed                                                                                                                                                                                                                                                                       |                      |
|                              |          | (d) <i>Cohort study</i> —If applicable, explain how loss to follow-up was addressed<br><br><i>Case-control study</i> —If applicable, explain how matching of cases and controls was addressed<br><br><i>Cross-sectional study</i> —If applicable, describe analytical methods taking account of sampling strategy |                      |
|                              |          | (e) Describe any sensitivity analyses                                                                                                                                                                                                                                                                             |                      |
| <b>Results</b>               |          |                                                                                                                                                                                                                                                                                                                   |                      |
| Participants                 | 13*      | (a) Report numbers of individuals at each stage of study—eg numbers potentially eligible, examined for eligibility, confirmed eligible, included in the study, completing follow-up, and analysed                                                                                                                 |                      |
|                              |          | (b) Give reasons for non-participation at each stage                                                                                                                                                                                                                                                              |                      |
|                              |          | (c) Consider use of a flow diagram                                                                                                                                                                                                                                                                                |                      |
| Descriptive Data             | 14*      | (a) Give characteristics of study participants (eg demographic, clinical, social) and information on exposures and potential confounders                                                                                                                                                                          |                      |
|                              |          | (b) Indicate number of participants with missing data for each variable of interest                                                                                                                                                                                                                               |                      |
|                              |          | (c) <i>Cohort study</i> —Summarise follow-up time (eg, average and total amount)                                                                                                                                                                                                                                  |                      |
| Outcome Data                 | 15*      | <i>Cohort study</i> —Report numbers of outcome events or summary measures over time                                                                                                                                                                                                                               |                      |
|                              |          | <i>Case-control study</i> —Report numbers in each exposure category, or summary measures of exposure                                                                                                                                                                                                              |                      |
|                              |          | <i>Cross-sectional study</i> —Report numbers of outcome events or summary measures                                                                                                                                                                                                                                |                      |

| Section and Item         | Item No. | Recommendation                                                                                                                                                                                               | Reported on Page No. |
|--------------------------|----------|--------------------------------------------------------------------------------------------------------------------------------------------------------------------------------------------------------------|----------------------|
| Main Results             | 16       | (a) Give unadjusted estimates and, if applicable, confounder-adjusted estimates and their precision (eg, 95% confidence interval). Make clear which confounders were adjusted for and why they were included |                      |
|                          |          | (b) Report category boundaries when continuous variables were categorized                                                                                                                                    |                      |
|                          |          | (c) If relevant, consider translating estimates of relative risk into absolute risk for a meaningful time period                                                                                             |                      |
| Other Analyses           | 17       | Report other analyses done—eg analyses of subgroups and interactions, and sensitivity analyses                                                                                                               |                      |
| <b>Discussion</b>        |          |                                                                                                                                                                                                              |                      |
| Key Results              | 18       | Summarise key results with reference to study objectives                                                                                                                                                     |                      |
| Limitations              | 19       | Discuss limitations of the study, taking into account sources of potential bias or imprecision. Discuss both direction and magnitude of any potential bias                                                   |                      |
| Interpretation           | 20       | Give a cautious overall interpretation of results considering objectives, limitations, multiplicity of analyses, results from similar studies, and other relevant evidence                                   |                      |
| Generalisability         | 21       | Discuss the generalisability (external validity) of the study results                                                                                                                                        |                      |
| <b>Other Information</b> |          |                                                                                                                                                                                                              |                      |
| Funding                  | 22       | Give the source of funding and the role of the funders for the present study and, if applicable, for the original study on which the present article is based                                                |                      |

\*Give information separately for cases and controls in case-control studies and, if applicable, for exposed and unexposed groups in cohort and cross-sectional studies.

**Once you have completed this checklist, please save a copy and upload it as part of your submission. DO NOT include this checklist as part of the main manuscript document. It must be uploaded as a separate file.**

# BMJ Open

## Cross-sectional hospital based-study on the sero-prevalence of Hepatitis B virus markers among health care workers, NWR, Cameroon.

|                                 |                                                                                                                                                                                                                                                                                                                                                                                                                                                                                        |
|---------------------------------|----------------------------------------------------------------------------------------------------------------------------------------------------------------------------------------------------------------------------------------------------------------------------------------------------------------------------------------------------------------------------------------------------------------------------------------------------------------------------------------|
| Journal:                        | <i>BMJ Open</i>                                                                                                                                                                                                                                                                                                                                                                                                                                                                        |
| Manuscript ID                   | bmjopen-2020-045716.R2                                                                                                                                                                                                                                                                                                                                                                                                                                                                 |
| Article Type:                   | Original research                                                                                                                                                                                                                                                                                                                                                                                                                                                                      |
| Date Submitted by the Author:   | 25-Mar-2021                                                                                                                                                                                                                                                                                                                                                                                                                                                                            |
| Complete List of Authors:       | Akazong, Etheline; University of Dschang, Department of Biochemistry Tume, Christopher; University of Dschang Faculty of Sciences; University of Bamenda, Department of Biochemistry Ayong, Lawrence; Centre Pasteur Cameroun Njouom, Richard; Centre Pasteur of Cameroon, Kenmoe, Sebastien; Centre Pasteur of Cameroon, Virology Njankouo, Ripa; Centre Pasteur du Cameroun, Virology Unit Kuate, Jules-Roger; University of Dschang Faculty of Sciences, Department of Biochemistry |
| <b>Primary Subject Heading</b>: | Public health                                                                                                                                                                                                                                                                                                                                                                                                                                                                          |
| Secondary Subject Heading:      | Epidemiology, Infectious diseases                                                                                                                                                                                                                                                                                                                                                                                                                                                      |
| Keywords:                       | Epidemiology < INFECTIOUS DISEASES, VIROLOGY, Public health < INFECTIOUS DISEASES, Biochemistry < NATURAL SCIENCE DISCIPLINES                                                                                                                                                                                                                                                                                                                                                          |
|                                 |                                                                                                                                                                                                                                                                                                                                                                                                                                                                                        |

SCHOLARONE™  
Manuscripts



I, the Submitting Author has the right to grant and does grant on behalf of all authors of the Work (as defined in the below author licence), an exclusive licence and/or a non-exclusive licence for contributions from authors who are: i) UK Crown employees; ii) where BMJ has agreed a CC-BY licence shall apply, and/or iii) in accordance with the terms applicable for US Federal Government officers or employees acting as part of their official duties; on a worldwide, perpetual, irrevocable, royalty-free basis to BMJ Publishing Group Ltd ("BMJ") its licensees and where the relevant Journal is co-owned by BMJ to the co-owners of the Journal, to publish the Work in this journal and any other BMJ products and to exploit all rights, as set out in our [licence](#).

The Submitting Author accepts and understands that any supply made under these terms is made by BMJ to the Submitting Author unless you are acting as an employee on behalf of your employer or a postgraduate student of an affiliated institution which is paying any applicable article publishing charge ("APC") for Open Access articles. Where the Submitting Author wishes to make the Work available on an Open Access basis (and intends to pay the relevant APC), the terms of reuse of such Open Access shall be governed by a Creative Commons licence – details of these licences and which [Creative Commons](#) licence will apply to this Work are set out in our licence referred to above.

Other than as permitted in any relevant BMJ Author's Self Archiving Policies, I confirm this Work has not been accepted for publication elsewhere, is not being considered for publication elsewhere and does not duplicate material already published. I confirm all authors consent to publication of this Work and authorise the granting of this licence.



1  
2  
3 **Cross-sectional hospital based-study on the sero-prevalence of Hepatitis B virus**  
4 **markers among health care workers, NWR, Cameroon.**  
5

6 Akazong W. Etheline<sup>1</sup>, Tume Christopher<sup>1,2</sup>, Ayong Lawrence<sup>3</sup>, Njouom Richard<sup>4</sup>, Kenmoe  
7 Sebastien<sup>4</sup>, Njankouo Ripa<sup>4</sup>, Kuate Jules-Roger<sup>1\*</sup>.  
8  
9

10 <sup>1</sup> Department of Biochemistry, University of Dschang  
11

12 <sup>2</sup> Department of Biochemistry, University of Bamenda  
13

14 <sup>3</sup> Malaria unit, Centre Pasteur of Cameroon, Yaoundé, Cameroon  
15

16 <sup>4</sup> Virology unit, Centre Pasteur of Cameroon, Yaoundé, Cameroon  
17

18 Short title: Akazong *et al.*; 2020  
19

20  
21 \*Corresponding Author  
22

23 Kuate Jules-Roger  
24

25 Department of Biochemistry  
26

27 University of Dschang  
28

29 BP 67, Dschang, Cameroon  
30

31 Fax: +237 234 691 506  
32

33 Tel: +237 699 679 135  
34

35 Email: [jules.kuate@univ-dschang.org](mailto:jules.kuate@univ-dschang.org)  
36  
37  
38  
39  
40  
41  
42  
43  
44  
45  
46  
47  
48  
49  
50  
51  
52  
53  
54  
55  
56  
57  
58  
59  
60

## Abstract

**Background:** Hepatitis B virus (HBV) infection is a major public health issue worldwide, with about 257 million people reported to be chronic carriers by the World Health Organization factsheet updated in 2018. HBV can be contracted via direct contact with infected body fluid and infection is almost always asymptomatic. Although healthcare workers (HCWs) are at high risk of HBV infection, little is known about the prevalence of the various HBV markers among HCWs in Cameroon. The present study was taken to evaluate the prevalence of different HBV serological markers among HCWs in the North-West Region of Cameroon.

**Methods:** This cross-sectional hospital based study was carried out between April to September (2017) during which 395 HCWs were recruited. The serum of the HCWs were tested for the presence of HBV core antibody (anti-HBc), Hepatitis B surface antibody (anti-HBs), Hepatitis B e antibody (anti-HBe) and Hepatitis B surface antigen (HBsAg) using Monalisa™ ELISA kits produced by BIO-RAD laboratories. Data was analysed using SPSS version 20.0.

**Results:** Among the 395 participants, 270 (68.4%) of them were females, 187 (47.3%) had been exposed to HBV, 145 (36.7%) had resolved the infection, 42 (10.6%) were current HBV carriers, 10 (2.5%) were infective, 36 (9.1%) were vaccinated and 172 (43.5%) were still susceptible. Exposure to HBV, past infection and susceptibility were significantly associated with age while the rate of vaccination was significantly associated with the job of the HCW in the health facilities.

**Conclusion:** The prevalence of HBV exposure and infection among HCWs obtained in this study was high while the level of vaccination in this at-risk population was low. Adequate steps should be taken to sensitize this population on HBV and the vaccination procedure.

**Keys words:** Hepatitis B Virus, Healthcare Workers, HBsAg, Anti-HBs, Anti-HBc, Anti-HBe.

1  
2  
3 **Abbreviations:** anti-HBc: hepatitis B core antibody, anti-HBs: Hepatitis B surface  
4 antibody, anti-HBe: HBV e antibody, HBsAg: Hepatitis B surface antigen, MD: Medical  
5 doctor, Lab tech: Laboratory technician, HCWs: Health care workers, SRN/SRM: State  
6 Registered Nurse/Midwife, NWR: North West Region, HND: Higher National Diploma,  
7 BSc: Bachelor of Science, HBsAg: Hepatitis B surface antigen, ELISA: Enzyme-linked  
8 immunosorbent assay, CMA: Centre medical d'arrondissement (district medical centres).

9  
10  
11  
12  
13  
14  
15  
16 **Strength:**

- 17  
18  
19  
20  
21  
22  
23  
24  
25  
26  
27  
28  
29  
30  
31  
32  
33  
34  
35  
36  
37  
38  
39  
40  
41  
42  
43  
44  
45  
46  
47  
48  
49  
50  
51  
52  
53  
54  
55  
56  
57  
58  
59  
60
- Monalisa™ ULTRA ELISA kits with 100% sensitivity and specificity of 99.28% was used to determine HBV serological markers.
  - Stratified sampling technique, which permits estimation of population parameters for groups within population was used for sampling.

26  
27  
28  
29  
30  
31  
32  
33  
34  
35  
36  
37  
38  
39  
40  
41  
42  
43  
44  
45  
46  
47  
48  
49  
50  
51  
52  
53  
54  
55  
56  
57  
58  
59  
60

**Limitation:**

- The anti-HBs titer was not quantified thus the percentage of HCWs considered to be vaccinated in this study is higher than the actual percentage with a protective level of anti-HBs..
- Liver biopsy was not done to prove the complete clearance of the virus in resolved infection and serum HBV DNA was not measured since there is no kit available yet to determine this marker.
- The present study covers a cross-section of health professionals, so caution should be taken while generalizing the results.

## INTRODUCTION

Hepatitis B virus infection is a viral infection that attacks the liver and can cause both acute, self-resolving, and chronic disease (1). The Hepatitis B virus (HBV), made of a partially double stranded DNA belongs to the family of Hepadnaviridae. This virus found in both blood and body fluids of infected persons, can be transmitted to the mucus membrane or blood stream of non-infected persons (1). According to the WHO fact sheet updated in July 2018, an estimated 257 million people are infected with HBV worldwide and more than 887,000 people died in 2015 due to complications of HBV including cirrhosis and hepatocellular carcinoma (2). The level of HBV varies widely across WHO regions with the WHO African and WHO Western Pacific Region sharing the greatest burden (6.1% and 6.2% of the population respectively). In Cameroon, a sub-Saharan African country, HBV infection is considered hyper-endemic with a prevalence rate estimated at 11.5% (3).

HBV infection is preventable with the presence of a vaccine which confers over 96% protection to recipients (4,5). In Cameroon, the HBV vaccine (Zilbrix™, a DTPw-HBV combination vaccine) was first introduced into the expanded immunization program (EPI) administered to babies at 6 weeks, 10 weeks and 14 weeks (6). The monovalent birth dose implemented in 2017 is limited to babies born of HBV positive mothers. This vaccine administered during early childhood can only provide some level of protection during early adulthood (5–7).

Health-care workers (HCWs) whose job is to care for the sick and injured are often exposed to blood and other body fluids in the course of their work. Consequently, they are at increased risk of infection with blood borne viruses such as Human Immunodeficiency virus (HIV), HBV and Hepatitis C Virus (8). The risk of infection for health workers depend on the prevalence of the disease in the patient population and the nature and the frequency of exposures (9). HCWs when infected, are at risk of transmitting HBV to their patients (9). Because of the risk associated with their occupation, WHO recommends that all non-infected health care workers be vaccinated against HBV (8).

1  
2  
3 A national survey in Cameroon on the prevalence of HBV among HCWs reported a  
4 national sero-prevalence of 8.75% current infection (10) while a recent study carried out  
5 among HCWs in this region reported a prevalence of 10.6% (11). Very little work has  
6 been done on the various HBV serological markers (anti-HBc, anti-HBs, anti-HBe and  
7 HBeAg) to evaluate exposure, natural immunity (past or resolved infection), infectivity,  
8 vaccination (acquired immunity) and susceptibility (12,13). In this study, we therefore  
9 set out to evaluate the different serological markers associated with HBV infection (anti-  
10 HBc, anti-HBs, HBsAg and anti-HBe). These serological markers were used to evaluate  
11 the prevalence of exposure, natural immunity, current infection, infectivity, acquired  
12 immunity and susceptibility to HBV among HCWs in our setting. Knowledge on these HBV  
13 epidemiological features can assist in the development of specific programs such as  
14 vaccination campaigns for susceptible HCWs and guide health policy makers in  
15 prioritizing and optimizing treatment of infected and/or infective HCWs. This in turn can  
16 help public health surveillance institutions in our resource-limited setting to optimize the  
17 available resources.  
18  
19  
20  
21  
22  
23  
24  
25  
26  
27  
28  
29  
30

## 31 **MATERIALS AND METHODS**

### 32 **Study design and setting**

33 This was a cross-sectional hospital-based study conducted between April and September  
34 2017. The study included 22 health facilities in the Bamenda health district (one regional  
35 hospital, three CMAs (Centre medical d'arrondissement), six mission hospitals, five  
36 government health centres and seven private hospitals). Testing stations were set up in  
37 the various wards of the health facilities. Over 70% of HCWs in the various health  
38 facilities were recruited for this study.  
39  
40  
41  
42  
43  
44  
45  
46  
47

### 48 **Case definition**

49 In this study, exposure was defined as being tested positive for the anti-HBc only, natural  
50 immunity (past/resolved infection) was being tested positive for anti-HBc and anti-HBs,  
51 current infection was defined as being tested positive for HBsAg, infective subjects were  
52 those who were tested positive for HBsAg and negative for anti-HBe, vaccinated subjects  
53 were those who were tested positive for anti-HBs only while susceptible (naïve) subjects  
54 were those who were negative for all HBV serological markers. Being tested positive  
55 implies they were reactive for the marker of interest.  
56  
57  
58  
59  
60

### Sample size and justification

Sample size was determined using the formula proposed by Scott Smith for determining population proportion sample size (14):  $X=Z\text{-score} \times SD \times (1-SD)/MOE$ . The proportion of HCWs in the NWR was obtained from a registry which published the national proportions of HCWs per region in 2015 (15). The confidence level was 95%, giving a Z-score of 1.96, a margin of error (MOE) of  $\pm 5$  and an SD of 0.5. The calculated sample size using this formula was 385 persons.

### Sample collection

All HCWs present in the Bamenda Health District (BHD) during the study were invited to participate in this study. HCWs who consented to the study were asked to sign a consent form, fill a self-administered questionnaire after which 4ml of blood was collected from them into a red cap (dry) tube. Identification number was used to link participant's laboratory results and the questionnaire. A standardized questionnaire designed by the researcher was used to collect socio-demographic data and HCWs category. HCWs included medical doctors, nurses, laboratory technicians, dentist, pharmacist and hospital auxiliary staff (cleaners, carriers, launders).

### HBV serology

Monalisa™ ELISA kits produced by BIO-RAD laboratories with sensitivity and specificity greater than 99% were used to qualitatively determine the different HBV serological markers. Monalisa™ HBsAg ULTRA ELISA kit was used to test for the presence of HBsAg, Monalisa™ Anti-HBs PLUS ELISA kit (BIORAD, Marnes- La-Coquette-France), was used to test for the presence of anti-HBs, Monalisa™ Anti-HBc PLUS ELISA kit was used to test for the presence of anti-HBc while Monalisa™ HBe Ag-Ab PLUS ELISA kit (BIORAD, Marnes- La-Coquette-France) was used to test for the presence of anti-HBe.

### Statistical analysis

Statistical analysis was performed using the Statistical software IBM® SPSS® Statistics Version 22.0 for mac. Continuous data were expressed as median values with 1st and 3rd interquartile ranges (IQR). Categorical data were expressed as percentages. Pearson's  $\chi^2$  ( $p < .05$ ) was used to assess the significance among study variables. Odd ratio was

1  
2  
3 calculated using binary logistic regression. Odd ratio was calculated using binary logistic  
4 regression.  
5  
6  
7

## 8 **RESULTS**

### 9 **Characteristics of study population**

10 A total of 395 health care workers (HCWs) from the different hospitals in this region  
11 participated in the study. Among these, 68.4% (n=270) were women (  
12  
13  
14  
15  
16  
17  
18  
19  
20  
21  
22  
23  
24  
25  
26  
27  
28  
29  
30  
31  
32  
33  
34  
35  
36  
37  
38  
39  
40  
41  
42  
43  
44  
45  
46  
47  
48  
49  
50  
51  
52  
53  
54  
55  
56  
57  
58  
59  
60

1  
2  
3 Table 1). The 16 to 25 years old age group represented 42.0% (n=166) of the study  
4 population. The median age of the study population was 27.0 years (IQR, 23 - 32 years).  
5  
6 Nurses were the most represented in the HCWs category, (n=224, 56.3%).  
7  
8  
9

### 10 **Exposure to HBV**

11 Anti-HBc was used to determine exposure to HBV (Table 2). Of the 395 health care  
12 workers who participated in this study, 187 (47.3%) were tested positive for anti-HBc. A  
13 statistically significant association was observed between exposure and age (p-  
14 value<.001). Exposure to HBV significantly increased with age and HCWs belonging to  
15 the (46-65) years age group had a greater than 3.5 times probability of being exposed to  
16 HBV when compared to those belonging to the (16-25) years age group. There was no  
17 significant association between sex, HCWs category and exposure. However, exposure  
18 was relatively lower among dentist (n=4, 26.7%) than among other HCWs. Prevalence of  
19 exposure was similar between sexes.  
20  
21  
22  
23  
24  
25  
26  
27  
28  
29

### 30 **Natural immunity against HBV (HBV clearance)**

31 A combination of anti-HBc and anti-HBs was used to evaluate natural immunity against  
32 HBV (past/resolved infection) (Table 2). One hundred and forty-five (77.5%) HCWs who  
33 had come in contact with HBV had effectively cleared the virus. Natural immunity was  
34 significantly associated with age (p-value<.05), and was highest in the (36-45) year age  
35 group (n=27, 54.0%). HCWs belonging to the (36-45) year age group showed a 3 times  
36 significantly greater probability of resolving the infection when compared to HCWs  
37 belonging to the (16-25) year age group. There was no significant correlation between  
38 ability to clear the hepatitis B virus, sex and HCWs category.  
39  
40  
41  
42  
43  
44  
45  
46  
47

### 48 **Current HBV infection**

49 The presence of HBsAg was used to determine current HBV infection (Table 3). HBsAg  
50 was detected in 42 of the 395 HCWs (10.6%). There was no statistically significant  
51 association between sex, age, HCWs category and current infection. HBsAg infection was  
52 higher among females (n=33, 12.2%; 1.795, 95%CI [0.831-3.875])) than among males  
53 (n=9, 7.2%). Majority of HBsAg infected HCWs belonged to the (46-65) year age group  
54 (n=4, 16.7%) and were dentist (n=2, 13.3%).  
55  
56  
57  
58  
59  
60



### **HBV infectivity among HCWs**

The presence of HBsAg and the absence of anti-HBe were used to evaluate HBV infectivity (Table 3). Among the 10.4% of HCWs infected with HBV, 23.8% (n=10) of them and 2.5% of all the HCWs in this study were infective. There was no significant association between sex, age, job and being HBV infective. More females were infective (n=8, 3.0%) compared to males (n=2, 1.6%). The (46-65) year age group recorded the highest prevalence of infective HCWs (n=2, 8.3%) and were pharmacist (n=1, 12.5%).

### **Acquired immunity (vaccinated) HCWs**

The absence of anti-HBc and the presence of anti-HBs were used to determine vaccinated HCWs (Table 2). Among the 208 HCWs who had never been exposed to HBV, 17.3% (n=36) of them and 9.1% of the 395 study participants were vaccinated. There was a statistically significant association between being vaccinated and HCWs category (p-value<.05). Nurses (n=15, 6.7%; 0.197, 95%CI[0.056-0.695], p-value=.012) and auxiliary staff (2, 4.9%; 0.141, 95%CI[0.023-0.874], p-value=.036) had a significantly lower probability of being vaccinated when compared to dentist. Males and females had a similar prevalence of acquired immunity (12 [9.6%] males and 24 [8.9%] females). Most of those vaccinated belonged to the (26-35) year age group (n=15, 9.7%) and were dentist (n=4, 26.7%). There was no significant association between acquired immunity, sex and job.

### **Susceptible HCWs**

Susceptibility was determined by the absence of anti-HBc, anti-HBs and HBsAg in serum (Table 3). Among the 395 HCWs who participated in this study, 43.5% (n=172) of them were still susceptible to HBV. A statistically significant association was observed between age and susceptibility (p-value<.001). Susceptibility significantly decreased with age and was highest in the (16-25) year age group (n=90, 54.2%). There was no significant association between susceptibility, sex and HCWs category.

## **DISCUSSION**

Hepatitis B virus is a major cause of Chronic Hepatitis, Liver Cirrhosis and Hepatocellular Carcinoma. As a viral infection, which can be transmitted via percutaneous and mucosal exposure to infective body fluids, HBV stands as a serious nosocomial infection in health

1  
2  
3 care settings. The current study aimed at evaluating the sero-prevalence of the different  
4 HBV serological profiles among HCWs in the NWR of Cameroon showed a high HBV  
5 burden in this population. A number of epidemiological and cross-sectional studies have  
6 reported marked variation in the prevalence of the various HBV serological profiles  
7 among HCWs within and out of the country (10–13,16–18). HBV prevalence in this at-  
8 risk group seems to vary with the HBV prevalence in the general population.  
9

### 15 **Exposure to HBV**

16  
17 The prevalence of HBV exposure obtained in the current study was high (47.3%) and  
18 significantly associated with age. This rate of exposure is relatively higher than the 19%  
19 obtained by Tasilong *et al* in Yaoundé (the capital of Cameroon) in 2016 (12). The  
20 difference in prevalence could be because of the difference in the diagnostic technique  
21 used, given that Tasilong *et al* worked with the one-step, rapid strip test which has a  
22 relatively lower sensitivity and specificity when compared to the ELISA technique used  
23 in this study (19–22). Besides, the distribution of the HBV vaccine in the expanded  
24 immunization program (EPI), administered to babies was first introduced in Yaoundé  
25 and subsequently to other regions (6). This HBV childhood vaccine has been proposed to  
26 provide some level of protection against HBV during early adulthood (protection which  
27 wanes as you grow older) and might justify the increase in the rate of HBV exposure with  
28 age (5–7,23). Finally, older HCWs have spent a longer time in the hospital compared to  
29 the younger HCWs most of who are starting in the field.  
30  
31  
32  
33  
34  
35  
36  
37  
38  
39  
40

### 41 **Natural immunity against HBV (HBV clearance)**

42  
43 The prevalence of acquired immunity among HCWs exposed to HBV was high and was  
44 significantly associated with age. In effect, it is known that the clinical course and  
45 outcome of HBV infection is greatly influenced by the age at infection, the level of HBV  
46 replication and the host immune status (24). This might justify the relatively low level of  
47 resolved infection in the 16-25 years age group (27.5%) which increased up to the 36-45  
48 years age group (54.0%) and finally dropped in the 46-65 years age group (50%).  
49 However, the prevalence of natural immunity was comparable between the sexes  
50 eventhough males had a lower probability of resolving the infection when compared to  
51 females. The similarity in prevalence of natural immunity is contrary to what is  
52 anticipated given that women generally show a stronger innate and adaptive (humoral  
53  
54  
55  
56  
57  
58  
59  
60

1  
2  
3 and cellular) immune responses when compared to males (25). This similarity in  
4 prevalence of natural immunity may be justified by the fact that in countries with high  
5 prevalence of HBV, exposure to HBV often occurs during birth and early childhood, and  
6 infection may progress for 20 to 25 years in a subtle manner as stated above. The  
7 expanded immunization program evoked earlier might have reduced the level of  
8 exposure to HBV during childhood justifying the seemingly high prevalence of HBV  
9 acquired immunity among those exposed to HBV. The reason why this disease is self-  
10 limiting in some people and not in others have not yet been fully understood. However,  
11 it is believed that the host's immune system and the genome of the infecting HBV might  
12 play an important role in determining the outcome of the disease in healthy adults.  
13  
14  
15  
16  
17  
18  
19  
20  
21  
22

### 23 **Current HBV infection**

24 The prevalence of HBV infection obtained in this study was high (10.6%) given that they  
25 exist a safe and competent vaccine. The prevalence of HBsAg positivity is higher than the  
26 8.75% obtained by Ndongo *et al.* in the NWR in their national survey among HCWs in  
27 Cameroon (10). The difference in prevalence could be justified by the fact that the  
28 national survey focused on the regional hospital (which represents the government  
29 reference hospital in this region) and used a different technique (rapid strip test). The  
30 same study mentioned above reported a prevalence of 5.4% in Yaoundé and 24% in the  
31 Far North Region, while Loriette *et al.*, working in the Far North Region of Cameroon  
32 recorded a prevalence of 18% in 2015 (10,18). This alternating prevalence, could be a  
33 reflection of the cultural and climatic differences existing between the different ethnic  
34 groups alongside the diverse geographical scenery of the country (10).  
35  
36  
37  
38  
39  
40  
41  
42  
43  
44

### 45 **HBV infectivity among HCWs**

46 HBeAg is a serological marker that indicates the presence of HBV DNA in blood circulation  
47 in wild-type HBV. As the immune system clears HBV DNA, HBeAg reduces in the blood  
48 circulation as anti-HBe appears (26,27). Mutations in some cases can result in HBV DNA  
49 being present in blood circulation in the absence of HBeAg (26,27). However, because  
50 there is no ELISA kit to determine the presence of HBV DNA in serum, we defined  
51 infectivity as the presence of HBsAg and absence of anti-HBe. This classification of  
52 infectivity is the best classification using the ELISA kits but is a limitation to the study  
53 given that some infected HCWs can go undetected. Among the 10.4% of HCWs infected  
54  
55  
56  
57  
58  
59  
60

1  
2  
3 with HBV, 23.8% of them were infective. The persistence of HBeAg in blood is always  
4 associated with progress towards a liver disease as well as an increase probability of  
5 transmitting the virus. Even though there exist a management guide proposed by WHO  
6 in 2015, this high prevalence of infectivity among infected HCWs might be because of the  
7 elevated cost involve in managing the disease (9,28).  
8  
9  
10  
11  
12

### 13 **Acquired immunity (vaccinated) HCWs**

14 According to the 'CDC updates HBV vaccination guidelines for HCWs' (2014), healthcare  
15 personnel should be vaccinated against HBV before exposure to blood or body fluids and  
16 should receive serologic testing to assess for anti-HBs (29). Still, just 9.1% of HCWs in our  
17 setting showed acquired immunity. HCWs belonging to the (16-25) year age group were  
18 the most vaccinated. This might be because of the expanded immunization invoked  
19 earlier (6,7,23). But most probable is the fact that some institutions now ask for proof of  
20 HBV vaccination in none-infected individuals before hire or matriculation. Overall, the  
21 low prevalence of HCWs vaccinated against HBV might either be due to inappropriate  
22 sensitization on HBV or the cost of the HBV vaccine.  
23  
24  
25  
26  
27  
28  
29  
30  
31  
32

### 33 **Susceptible HCWs**

34 HBV susceptibility in our study was high (43.5%) and was inversely proportional to age.  
35 The statistically significant association between age and susceptibility to HBV might be  
36 explained by the decrease in childhood and maternal transmission of HBV due to the  
37 expanded immunization explained above (6,7,23). Unfortunately, this infant vaccine  
38 cannot provide adequate protection in adulthood and most parents never go for the  
39 booster dose because of the cost of the vaccine reducing childhood HBV transmission but  
40 increasing the number of susceptible adult HCWs. More so, duration in the hospital  
41 increases with age. Thus, the younger HCWs whose duration in healthcare settings is less  
42 than that of older HCWs and who still have a longer period to work in this setting have  
43 not been exposed to HBV nosocomial risk factors like older HCWs and have a higher risk  
44 of eventually getting exposed when compared to older HCWs.  
45  
46  
47  
48  
49  
50  
51  
52  
53  
54  
55

### 56 **CONCLUSION**

57 This study revealed a considerable burden (10.6% current infection) of HBV infection in  
58 the Bamenda health District, North West Region of Cameroon. Among the infected HCWs,  
59  
60

1  
2  
3 over 23.8% of them were infective. These infective HCWs are at risk of infecting their  
4 patients. Subsidizing management of HBV for HCWs might reduce the prevalence of  
5 infective HCWs and consequently the probability of HBV nosocomial infection from  
6 HCWs to their patients. Prevalence of HBV vaccination was low (9.1%) while prevalence  
7 of exposure (47.3%) and susceptibility (43.5%) to HBV were high. There is thus a high  
8 need for sensitization of HCWs in this area on HBV transmission and prevention. The  
9 sensitisation along with an effective and massive vaccination campaign should be carried  
10 out in this region not only among HCWs but in the population in general.  
11  
12  
13  
14  
15  
16  
17  
18

## 19 **DECLARATIONS**

20  
21  
22 **Statement of Ethics:** Ethical clearance for the study was obtained from the National  
23 Ethics Committee of Cameroon (N°2017/02/871/CE/CNERSH/SP). Authorization to  
24 carry out research in the NWR was obtained from the regional delegation. Authorizations  
25 to access different hospitals were obtained from the directors or the in-charge of the  
26 hospitals. Authorization to access health centers was obtained from the District medical  
27 officer (DMO) and the chief of centers of the health facilities in this region. Written  
28 informed consent was obtained from each participant.  
29  
30  
31  
32  
33  
34  
35

36 **Consent for publication:** Not applicable.  
37  
38  
39

40 **Patients and public involvement:** No patient involve.  
41  
42  
43

44 **Availability of data and material:** Data are available in a public, open access repository  
45 (<https://doi.org/10.6084/m9.figshare.13503231.v1>).  
46  
47

48 **Competing interests:** The authors declare that they have no competing interests.  
49  
50  
51

52 **Funding:** Not applicable.  
53  
54  
55

56 **Authors' contribution:** AE and TC designed the study; AE and NRipa performed the  
57 experiments; AE drafted the manuscript; TC, NR, AL, KJR and KS were involved in editing  
58  
59  
60

1  
2  
3 the manuscript; AE and KS performed the statistical analysis. All authors read and  
4 approved the final manuscript.  
5  
6  
7

8 **Acknowledgement:** All HCWs in the Bamenda Health District who consented to  
9 participate in this study; Dr. Akassong D. Dinga Wonanke for helping with the purchase  
10 of material, Mr Fondoh Victor for his help at the start of this work, RHB for permitting  
11 the blood samples to be stored in the RHB laboratory freezer during sample collection.  
12  
13  
14  
15  
16

## 17 Reference

- 18 1. Kathleen D. Hepatitis B: causes, symptoms and treatment. Medical News Today.  
19 2018.  
20  
21
- 22 2. World Health Organisation. Updated factsheet: Hepatitis B. In Geneva: WHO; 2020.  
23
- 24 3. Njouom R, Tejiokem M, Texier G, Fontanet A. O-02: Prevalence of hepatitis B,  
25 hepatitis C and hepatitis D virus infections in Cameroon: results from a national  
26 population based survey (The ANRS 12289 project). J Viral Hepat. 2015;22(S2):1–2.  
27  
28
- 29 4. World Health Organization. Myths and facts about immunization,. WHO Regional  
30 Office for Europe; 2015.  
31  
32
- 33 5. Weekly epidemiological record. Geneva: WHO; 2009 Feb p. 405–20. Report No.: 40.  
34  
35
- 36 6. Gatchalian S, Reyes M, Bernal N, Lefevre I, David M-P, Han HH, et al. A New DTPw-  
37 HBV/Hib Vaccine is Immunogenic and Safe when Administered According to the EPI  
38 (Expanded Programme for Immunization) Schedule and Following Hepatitis B  
39 Vaccination at Birth. Human Vaccines. 2005 Sep 4;1(5):198–203.  
40  
41
- 42 7. Sande MAB van der, Waight P, Mendy M, Rayco-Solon P, Hutt P, Fulford T, et al.  
43 Long-Term Protection against Carriage of Hepatitis B Virus after Infant Vaccination.  
44 The Journal of Infectious Diseases. 2006 Jun;193(11):1528–35.  
45  
46
- 47 8. World Health Organisation. Health Care Worker Safety. In Geneva: WHO; 2003.  
48  
49
- 50 9. Jessica D, Kyle B, Costi D. Hepatitis B in health care workers: transmission events  
51 and guidance management. World J Hepat. 2015;7(3):488–97.  
52  
53  
54  
55  
56  
57  
58  
59  
60

10. Ndongo CB, Eteki L, Siedner M, Mbaye R, Chen J, Ntone R, et al. Prevalence and vaccination coverage of Hepatitis B among healthcare workers in Cameroon: A national seroprevalence survey. *Journal of Viral Hepatitis*. 2018 Dec 1;25(12):1582–7.
11. Akazong WE, Tume C, Njouom R, Ayong L, Fondoh V, Kuate J-R. Knowledge, attitude and prevalence of hepatitis B virus among healthcare workers: a cross-sectional, hospital-based study in Bamenda Health District, NWR, Cameroon. *BMJ Open*. 2020 Mar;10(3):e031075.
12. Tatsilong HOP, Noubiap JJN, Nansseu JRN, Aminde LN, Bigna JJR, Ndze VN, et al. Hepatitis B infection awareness, vaccine perceptions and uptake, and serological profile of a group of health care workers in Yaoundé, Cameroon. *BMC Public Health* [Internet]. 2016 Dec [cited 2018 Dec 11];16(1). Available from: <http://bmcpublihealth.biomedcentral.com/articles/10.1186/s12889-016-3388-z>
13. Chinese Military Medical Experts Group in Sierra Leone, Qin Y-L, Li B, Zhou Y-S, Zhang X, Li L, et al. Prevalence and associated knowledge of hepatitis B infection among healthcare workers in Freetown, Sierra Leone. *BMC Infectious Diseases* [Internet]. 2018 Dec [cited 2019 Aug 17];18(1). Available from: <https://bmcinfectdis.biomedcentral.com/articles/10.1186/s12879-018-3235-1>
14. Smith SM. Determining-Sample-Size. *qualtrics*. 2013;7.
15. Tandi TE, Cho Y, Akam AJ-C, Afoh CO, Ryu SH, Choi MS, et al. Cameroon public health sector: shortage and inequalities in geographic distribution of health personnel. *International Journal for Equity in Health* [Internet]. 2015 Dec [cited 2019 Feb 26];14(1). Available from: <http://www.equityhealthj.com/content/14/1/43>
16. Mueller A, Stoetter L, Kalluvya S, Stich A, Majinge C, Weissbrich B, et al. Prevalence of hepatitis B virus infection among health care workers in a tertiary hospital in Tanzania. *BMC Infectious Diseases* [Internet]. 2015 [cited 2018 Dec 11];15(1). Available from: <http://bmcinfectdis.biomedcentral.com/articles/10.1186/s12879-015-1129-z>

- 1  
2  
3 17. Fritzsche C, Becker F, Hemmer CJ, Riebold D, Klammt S, Hufert F, et al. Hepatitis B  
4 and C: neglected diseases among health care workers in Cameroon. *Transactions of*  
5 *The Royal Society of Tropical Medicine and Hygiene*. 2013 Mar;107(3):158–64.  
6  
7
- 8  
9 18. Loriette M, Birguel J, Damza R, Ratoua M, Karsikam S, Sobnangou JJ, et al. An  
10 experience of hepatitis B control in a rural area in Far North Cameroon. *Médecine et*  
11 *Santé Tropicales*. 2015;(4):422–7.  
12  
13
- 14  
15 19. Erhabor O, Kwaifa I, Bayawa A, Isaac Z, Dorcas I, Sani I. Comparison of ELISA and  
16 Rapid Screening Techniques for the Detection of HBsAg among Blood Donors in  
17 Usmanu Danfodiyo University Teaching Hospital Sokoto, North Western Nigeria  
18 [Internet]. *Journal of Blood & Lymph*. 2014 [cited 2018 Dec 11]. Available from:  
19 [https://www.omicsonline.org/open-access/comparison-of-elisa-and-rapid-](https://www.omicsonline.org/open-access/comparison-of-elisa-and-rapid-screening-techniques-for-the-detection-of-hbsag-among-blood-donors-in-usmanu-danfodiyo-university-teaching-hospital-sokoto-north-western-nigeria-2165-7831.1000124.php?aid=30523)  
20 [screening-techniques-for-the-detection-of-hbsag-among-blood-donors-in-usmanu-](https://www.omicsonline.org/open-access/comparison-of-elisa-and-rapid-screening-techniques-for-the-detection-of-hbsag-among-blood-donors-in-usmanu-danfodiyo-university-teaching-hospital-sokoto-north-western-nigeria-2165-7831.1000124.php?aid=30523)  
21 [danfodiyo-university-teaching-hospital-sokoto-north-western-nigeria-2165-](https://www.omicsonline.org/open-access/comparison-of-elisa-and-rapid-screening-techniques-for-the-detection-of-hbsag-among-blood-donors-in-usmanu-danfodiyo-university-teaching-hospital-sokoto-north-western-nigeria-2165-7831.1000124.php?aid=30523)  
22 [7831.1000124.php?aid=30523](https://www.omicsonline.org/open-access/comparison-of-elisa-and-rapid-screening-techniques-for-the-detection-of-hbsag-among-blood-donors-in-usmanu-danfodiyo-university-teaching-hospital-sokoto-north-western-nigeria-2165-7831.1000124.php?aid=30523)  
23  
24  
25  
26  
27  
28  
29
- 30  
31 20. Hayder I, Ahmed W, Alam SE. Comparison of Different ICT Kits for HBsAg and Anti  
32 HCV Using Gold Standard ELISA. *Pak J Med Res*. 2012;51(3):72–6.  
33  
34
- 35  
36 21. Cruz HM, Scalioni L de P, Paula VS de, Miguel JC, Ó KMR do, Milagres FAP, et al. Poor  
37 sensitivity of rapid tests for the detection of antibodies to the hepatitis B virus:  
38 implications for field studies. *Memórias do Instituto Oswaldo Cruz*. 2017 Jan  
39 30;112(3):209–13.  
40  
41  
42
- 43  
44 22. Cruz H, Scalioni L, Vanessa S, Elisangela F, Kycia M, Milagres F, et al. Evaluating  
45 HBsAg rapid test performance for different biological samples from low and high  
46 infection rate settings & populations. *BMC Infectious Diseases*. 2015;15:548–58.  
47  
48  
49
- 50  
51 23. Ott JJ, Stevens GA, Groeger J, Wiersma ST. Global epidemiology of hepatitis B virus  
52 infection: New estimates of age-specific HBsAg seroprevalence and endemicity.  
53 *Vaccine*. 2012 Mar;30(12):2212–9.  
54  
55
- 56  
57 24. Fattovich G, Zagni I, Scattoni C. Natural History of Hepatitis B and Prognostic  
58 Factors of Disease Progression. In: *Management of patients with viral hepatitis*. In:  
59 Marcellin P, editor. Paris: Hepatitis B; 2004. p. 203–20.  
60



- 1  
2  
3  
4  
5  
6  
7  
8  
9  
10  
11  
12  
13  
14  
15  
16  
17  
18  
19  
20  
21  
22  
23  
24  
25  
26  
27  
28  
29  
30  
31  
32  
33  
34  
35  
36  
37  
38  
39  
40  
41  
42  
43  
44  
45  
46  
47  
48  
49  
50  
51  
52  
53  
54  
55  
56  
57  
58  
59  
60
25. Ortona E, Pierdominici M, Rider V. Editorial: Sex Hormones and Gender Differences in Immune Responses. *Frontiers in Immunology* [Internet]. 2019 May 9 [cited 2020 Jun 9];10. Available from: <https://www.frontiersin.org/article/10.3389/fimmu.2019.01076/full>
  26. World Health Organisation. Training Modules on Hepatitis B and C Screening, Diagnosis and Treatment-Session 8. 2020 Jul 28; Geneva.
  27. Villar LM, Cruz HM, Barbosa JR, Bezerra CS, Portilho MM, Scalioni L de P. Update on hepatitis B and C virus diagnosis. *World Journal of Virology*. 2015;4(4):323.
  28. World Health Organization, Global Hepatitis Programme. Guidelines for the prevention, care, and treatment of persons with chronic hepatitis B infection [Internet]. Geneva: WHO; 2015 [cited 2018 Dec 11]. Available from: [http://apps.who.int/iris/bitstream/10665/154590/1/9789241549059\\_eng.pdf?ua=1&ua=1](http://apps.who.int/iris/bitstream/10665/154590/1/9789241549059_eng.pdf?ua=1&ua=1)
  29. Centers for Disease Control and Prevention. CDC updates HBV vaccination guidelines for HCWs - The Clinical Advisor [Internet]. *Clinical Advisor*. 2014 [cited 2018 Dec 11]. Available from: <https://www.clinicaladvisor.com/web-exclusives/cdc-updates-hbv-vaccination-guidelines-for-hcws/article/327757/#>

Table 1: Baseline characteristics of the study population

| <b>Variables</b>     | Frequency<br>(395) | Percentage<br>(100%) |
|----------------------|--------------------|----------------------|
| <b>Sex</b>           |                    |                      |
| Male                 | 125                | 31.6                 |
| Female               | 270                | 68.4                 |
| <b>Age Intervals</b> |                    |                      |
| 16-25                | 166                | 42.0                 |
| 26-35                | 155                | 39.2                 |
| 36-45                | 50                 | 12.7                 |
| 46-65                | 24                 | 6.1                  |
| <b>Job</b>           |                    |                      |
| Nurses               | 224                | 56.7                 |
| Lab Technicians      | 90                 | 22.8                 |
| Medical Doctors      | 17                 | 4.3                  |
| Dentist              | 15                 | 3.8                  |
| Pharmacist           | 8                  | 2.0                  |
| Auxiliary Staff      | 41                 | 10.4                 |

Data are n(%)

Table 2: Distribution of HBV profile group (n=395)

| Variables n(%) |                        | Exposure 187(47.3) |                        |                | Past Infection 145(36.7) |                         |                | Vaccination 36(9.1) |                        |                |
|----------------|------------------------|--------------------|------------------------|----------------|--------------------------|-------------------------|----------------|---------------------|------------------------|----------------|
|                |                        | n (%)              | OR (95% CI)            | P <sup>b</sup> | n (%)                    | OR (95% CI)             | P <sup>b</sup> | n (%)               | OR (95% CI)            | P <sup>b</sup> |
| Sex            | Male (n=125)           | 57(45.6)           | 1                      |                | 48(38.4)                 | 1                       |                | 12(9.6)             | 1                      |                |
|                | Female (n=270)         | 130(48.1)          | 1.108<br>(0.724-1.695) | .637           | 97(35.9)                 | 0.899<br>(0.581-1.394)  | .635           | 24(8.9)             | 0.919<br>(0.444-1.902) | .819           |
|                | p-value                | .358               |                        |                | .357                     |                         |                | .476                |                        |                |
| Age            | 16-25 (n=166)          | 60(36.1)           | 1                      |                | 46(27.7)                 | 1                       |                | 16(9.6)             | 1                      |                |
|                | 26-35 (n=155)          | 79(51.0)           | 1.836<br>(1.175-2.870) | <b>.008</b>    | 60(38.7)                 | 1.648<br>(1.031-2.634)  | <b>.037</b>    | 15(9.7)             | 1.004<br>(0.479-2.108) | .991           |
|                | 36-45 (n=50)           | 32(64.0)           | 3.141<br>(1.626-6.068) | <b>.001</b>    | 27(54.0)                 | 3.062<br>(1.596-5.877)  | <b>.001</b>    | 3(6.0)              | 0.598<br>(0.167-2.143) | .430           |
|                | 46-65 (n=24)           | 16(66.7)           | 3.533<br>(1.428-8.741) | <b>.006</b>    | 12(50.0)                 | 2.609<br>(1.094-6.223)  | <b>.031</b>    | 2(8.3)              | 0.852<br>(0.183-3.962) | .838           |
|                | p-value                | <b>&lt;.001</b>    |                        |                | <b>.003</b>              |                         |                | .869                |                        |                |
| Job            | Dentist (n=15)         | 4(26.7)            | 1                      |                | 2(13.3)                  | 1                       |                | 4(26.7)             | 1                      |                |
|                | Lab Technicians (n=90) | 35(38.9)           | 1.750<br>(0.516-5.929) | .369           | 27(30.0)                 | 2.786<br>(0.588-13.197) | .197           | 11(12.2)            | 0.383<br>(0.104-1.414) | .150           |
|                | Medical Doctors (n=17) | 8(47.1)            | 2.444<br>(.552-10.833) | .239           | 7(41.2)                  | 4.550<br>(0.771-26.835) | .094           | 2(11.8)             | 0.367<br>(0.057-2.372) | .292           |
|                | Nurse (n=224)          | 116(51.8)          | 2.954<br>(0.913-9.555) | .071           | 88(39.3)                 | 4.206<br>(0.927-19.090) | .063           | 15(6.7)             | 0.197<br>(0.056-0.695) | <b>.012</b>    |
|                | Pharmacist (n=8)       | 3(37.5)            | 1.650                  | .592           | 2(25.0)                  | 2.167                   | .488           | 2(25.0)             | 0.917                  | .931           |

|  |                        |          |                         |      |          |                         |             |             |                        |             |
|--|------------------------|----------|-------------------------|------|----------|-------------------------|-------------|-------------|------------------------|-------------|
|  |                        |          | (0.264-10.313)          |      |          | (0.244-19.276)          |             |             | (0.128-6.556)          |             |
|  | Auxiliary Staff (n=41) | 21(51.2) | 2.887<br>(0.789-10.573) | .109 | 19(46.3) | 5.614<br>(1.122-28.092) | <b>.036</b> | 2(4.9)      | 0.141<br>(0.023-0.874) | <b>.035</b> |
|  | p-value                | .187     |                         |      | .147     |                         |             | <b>.039</b> |                        |             |

Data are n(%); p-value<.05 is considered significant; OR: odd ratio.

Table 3: Distribution of HBV profile group (n=395)

| Variables n(%) |                | Current Infection 42(10.6) |                        |                | Infectivity 10(2.5) |                         |                | Susceptibility 172(43.5) |                        |                |
|----------------|----------------|----------------------------|------------------------|----------------|---------------------|-------------------------|----------------|--------------------------|------------------------|----------------|
|                |                | n (%)                      | OR (95% CI)            | P <sup>b</sup> | n (%)               | OR (95% CI)             | P <sup>b</sup> | n (%)                    | OR (95% CI)            | P <sup>b</sup> |
| Sex            | Male (n=125)   | 9(7.2)                     | 1                      |                | 2(1.6)              | 1                       |                | 56(44.8)                 | 1                      |                |
|                | Female (n=270) | 33(12.2)                   | 1.795<br>(0.831-3.875) | .136           | 8(3.0)              | 1.878<br>(0.393-8.974)  | .430           | 116(43.0)                | 0.928<br>(0.606-1.422) | .732           |
|                | p-value        | .089                       |                        |                | .337                |                         |                | .407                     |                        |                |
| Age            | 16-25 (n=166)  | 14(8.4)                    | 1                      |                | 4(2.4)              | 1                       |                | 90(54.2)                 | 1                      |                |
|                | 26-35 (n=155)  | 19(12.3)                   | 1.517<br>(0.732-3.141) | .262           | 3(1.9)              | 0.799<br>(0.176-3.630)  | .772           | 61(39.4)                 | 0.548<br>(0.352-0.854) | <b>.008</b>    |
|                | 36-45 (n=50)   | 5(10.0)                    | 1.206<br>(0.412-3.531) | .732           | 1(2.0)              | 0.827<br>(0.090-7.568)  | .866           | 15(30.0)                 | 0.362<br>(0.184-0.713) | <b>.003</b>    |
|                | 46-65 (n=24)   | 4(16.7)                    | 2.171<br>(0.651-7.246) | .207           | 2(8.3)              | 3.682<br>(0.637-21.290) | .145           | 6(25.0)                  | 0.281<br>(0.106-0.745) | <b>.011</b>    |
|                | p-value        | .529                       |                        |                | .313                |                         |                | <b>&lt;.001</b>          |                        |                |
| Job            | Dentist (n=15) | 2(13.3)                    | 1                      |                | 0(0.0)              | -                       |                | 7(46.7)                  | 1                      |                |

|                        |          |                         |      |         |                          |      |          |                        |      |
|------------------------|----------|-------------------------|------|---------|--------------------------|------|----------|------------------------|------|
| Lab Technicians (n=90) | 8(8.9)   | 0.634<br>(0.121-3.323)  | .590 | 0(0.0)  | -                        |      | 44(48.9) | 1.093<br>(0.366-3.269) | .873 |
| Medical Doctors (n=17) | 1(5.9)   | 0.406<br>(0.033-4.997)  | .482 | 1(5.9)  | 2.500<br>(0.147-42.440)  | .526 | 7(41.2)  | 0.800<br>(0.197-3.246) | .755 |
| Nurse (n=224)          | 28(12.5) | 0.929<br>(0.199-4.333)  | .925 | 7(3.1)  | 1.290<br>(0.155-10.774)  | .814 | 93(41.5) | 0.811<br>(0.284-2.315) | .696 |
| Pharmacist (n=8)       | 1(12.5)  | 0.929<br>(0.071-12.136) | .955 | 1(12.5) | 5.714<br>(0.319-102.386) | .236 | 3(37.5)  | 0.686<br>(0.119-3.963) | .673 |
| Auxiliary Staff (n=41) | 2(4.9)   | 0.333<br>(0.043-2.610)  | .295 | 1(2.4)  | 1                        |      | 18(43.9) | 0.894<br>(0.273-2.932) | .854 |
| p-value                | .687     |                         |      | .217    |                          |      | .896     |                        |      |

Data are n(%); p-value<.05 is considered significant; OR: odd ratio.

STROBE Statement—Checklist of items that should be included in reports of *cross-sectional studies*

|                              | Item No | Recommendation                                                                                                                                                                                               | Page No |
|------------------------------|---------|--------------------------------------------------------------------------------------------------------------------------------------------------------------------------------------------------------------|---------|
| <b>Title and abstract</b>    | 1       | (a) Indicate the study's design with a commonly used term in the title or the abstract                                                                                                                       | 1       |
|                              |         | (b) Provide in the abstract an informative and balanced summary of what was done and what was found                                                                                                          | 1       |
| <b>Introduction</b>          |         |                                                                                                                                                                                                              |         |
| Background/rationale         | 2       | Explain the scientific background and rationale for the investigation being reported                                                                                                                         | 4-5     |
| Objectives                   | 3       | State specific objectives, including any prespecified hypotheses                                                                                                                                             | 5       |
| <b>Methods</b>               |         |                                                                                                                                                                                                              |         |
| Study design                 | 4       | Present key elements of study design early in the paper                                                                                                                                                      | 5       |
| Setting                      | 5       | Describe the setting, locations, and relevant dates, including periods of recruitment, exposure, follow-up, and data collection                                                                              | 5       |
| Participants                 | 6       | (a) Give the eligibility criteria, and the sources and methods of selection of participants                                                                                                                  | 6       |
| Variables                    | 7       | Clearly define all outcomes, exposures, predictors, potential confounders, and effect modifiers. Give diagnostic criteria, if applicable                                                                     | 5       |
| Data sources/<br>measurement | 8*      | For each variable of interest, give sources of data and details of methods of assessment (measurement). Describe comparability of assessment methods if there is more than one group                         | 5-6     |
| Bias                         | 9       | Describe any efforts to address potential sources of bias                                                                                                                                                    | 6       |
| Study size                   | 10      | Explain how the study size was arrived at                                                                                                                                                                    | 5       |
| Quantitative variables       | 11      | Explain how quantitative variables were handled in the analyses. If applicable, describe which groupings were chosen and why                                                                                 | 6       |
| Statistical methods          | 12      | (a) Describe all statistical methods, including those used to control for confounding                                                                                                                        | 6       |
|                              |         | (b) Describe any methods used to examine subgroups and interactions                                                                                                                                          | 5-6     |
|                              |         | (c) Explain how missing data were addressed                                                                                                                                                                  | 6       |
|                              |         | (d) If applicable, describe analytical methods taking account of sampling strategy                                                                                                                           | 6       |
|                              |         | (e) Describe any sensitivity analyses                                                                                                                                                                        | 6       |
| <b>Results</b>               |         |                                                                                                                                                                                                              |         |
| Participants                 | 13*     | (a) Report numbers of individuals at each stage of study—eg numbers potentially eligible, examined for eligibility, confirmed eligible, included in the study, completing follow-up, and analysed            | 7-8     |
|                              |         | (b) Give reasons for non-participation at each stage                                                                                                                                                         | N/A     |
|                              |         | (c) Consider use of a flow diagram                                                                                                                                                                           | N/A     |
| Descriptive data             | 14*     | (a) Give characteristics of study participants (eg demographic, clinical, social) and information on exposures and potential confounders                                                                     | 7-8     |
|                              |         | (b) Indicate number of participants with missing data for each variable of interest                                                                                                                          | 7-8     |
| Outcome data                 | 15*     | Report numbers of outcome events or summary measures                                                                                                                                                         | 7-9     |
| Main results                 | 16      | (a) Give unadjusted estimates and, if applicable, confounder-adjusted estimates and their precision (eg, 95% confidence interval). Make clear which confounders were adjusted for and why they were included | 7-8     |

|                          |    |                                                                                                                                                                            |      |
|--------------------------|----|----------------------------------------------------------------------------------------------------------------------------------------------------------------------------|------|
|                          |    | (b) Report category boundaries when continuous variables were categorized                                                                                                  | 7-8  |
|                          |    | (c) If relevant, consider translating estimates of relative risk into absolute risk for a meaningful time period                                                           | 7-9  |
| Other analyses           | 17 | Report other analyses done—eg analyses of subgroups and interactions, and sensitivity analyses                                                                             | 7-9  |
| <b>Discussion</b>        |    |                                                                                                                                                                            |      |
| Key results              | 18 | Summarise key results with reference to study objectives                                                                                                                   | 9    |
| Limitations              | 19 | Discuss limitations of the study, taking into account sources of potential bias or imprecision. Discuss both direction and magnitude of any potential bias                 | 9-12 |
| Interpretation           | 20 | Give a cautious overall interpretation of results considering objectives, limitations, multiplicity of analyses, results from similar studies, and other relevant evidence | 9-12 |
| Generalisability         | 21 | Discuss the generalisability (external validity) of the study results                                                                                                      | 8-12 |
| <b>Other information</b> |    |                                                                                                                                                                            |      |
| Funding                  | 22 | Give the source of funding and the role of the funders for the present study and, if applicable, for the original study on which the present article is based              | 13   |

\*Give information separately for exposed and unexposed groups.

**Note:** An Explanation and Elaboration article discusses each checklist item and gives methodological background and published examples of transparent reporting. The STROBE checklist is best used in conjunction with this article (freely available on the Web sites of PLoS Medicine at <http://www.plosmedicine.org/>, Annals of Internal Medicine at <http://www.annals.org/>, and Epidemiology at <http://www.epidem.com/>). Information on the STROBE Initiative is available at [www.strobe-statement.org](http://www.strobe-statement.org).
